# Supplementary material for: MicroRNA-155 is essential for the optimal proliferation and survival of plasmablast B cells
Source: Life Sci Alliance. 2019 May 16;2(3):e201800244. doi: 10.26508/lsa.201800244 (PMC6524163; doi:10.26508/lsa.201800244)
Supplement: Supplementary file 1 [file LSA-2018-00244_TableS1.xlsx]

## Sheet: Table S1
GO Term	Description	P-value	FDR q-value	Enrichment	N	B	n	b	Genes
GO:0034622	cellular protein-containing complex assembly	2.42e-31	3.66e-27	4.2	19534	640	647	89	[Ndufa8 - nadh dehydrogenase (ubiquinone) 1 alpha subcomplex, 8, Ndufb8 - nadh dehydrogenase (ubiquinone) 1 beta subcomplex 8, Mnf1 - mitochondrial nucleoid factor 1, Hist2h3c1 - histone cluster 2, h3c1, Cenpn - centromere protein n, Mrps7 - mitchondrial ribosomal protein s7, Snrpf - small nuclear ribonucleoprotein polypeptide f, Pih1d1 - pih1 domain containing 1, Ndufa11 - nadh dehydrogenase (ub…
GO:1901566	organonitrogen compound biosynthetic process	2.65e-31	2.01e-27	3.91	19534	741	647	96	[Mrps18b - mitochondrial ribosomal protein s18b, Qrsl1 - glutaminyl-trna synthase (glutamine-hydrolyzing)-like 1, Stoml2 - stomatin (epb7.2)-like 2, Psph - phosphoserine phosphatase, Dut - deoxyuridine triphosphatase, Mrps7 - mitchondrial ribosomal protein s7, Nme3 - nme/nm23 nucleoside diphosphate kinase 3, Chchd1 - coiled-coil-helix-coiled-coil-helix domain containing 1, Tufm - tu translation e…
GO:0034641	cellular nitrogen compound metabolic process	3.32e-29	1.68e-25	1.94	19534	3885	647	250	[Fasn - fatty acid synthase, Apoa1bp - apolipoprotein a-i binding protein, Suv39h1 - suppressor of variegation 3-9 homolog 1 (drosophila), 2410016O06Rik - riken cdna 2410016o06 gene, Prmt5 - protein arginine n-methyltransferase 5, Chchd1 - coiled-coil-helix-coiled-coil-helix domain containing 1, Eif5a2 - eukaryotic translation initiation factor 5a2, Ahcy - s-adenosylhomocysteine hydrolase, Commd2…
GO:1901576	organic substance biosynthetic process	1.26e-28	4.76e-25	2.07	19534	3196	647	219	[Fasn - fatty acid synthase, Suv39h1 - suppressor of variegation 3-9 homolog 1 (drosophila), 2410016O06Rik - riken cdna 2410016o06 gene, Prmt5 - protein arginine n-methyltransferase 5, Chchd1 - coiled-coil-helix-coiled-coil-helix domain containing 1, Eif5a2 - eukaryotic translation initiation factor 5a2, Ahcy - s-adenosylhomocysteine hydrolase, Commd2 - comm domain containing 2, Chchd10 - coiled-…
GO:0009058	biosynthetic process	2.01e-28	6.09e-25	2.05	19534	3252	647	221	[Fasn - fatty acid synthase, Suv39h1 - suppressor of variegation 3-9 homolog 1 (drosophila), 2410016O06Rik - riken cdna 2410016o06 gene, Prmt5 - protein arginine n-methyltransferase 5, Chchd1 - coiled-coil-helix-coiled-coil-helix domain containing 1, Eif5a2 - eukaryotic translation initiation factor 5a2, Ahcy - s-adenosylhomocysteine hydrolase, Commd2 - comm domain containing 2, Chchd10 - coiled-…
GO:0008152	metabolic process	1.44e-27	3.64e-24	1.53	19534	7680	647	389	[Suv39h1 - suppressor of variegation 3-9 homolog 1 (drosophila), Apoa1bp - apolipoprotein a-i binding protein, 2410016O06Rik - riken cdna 2410016o06 gene, Eif5a2 - eukaryotic translation initiation factor 5a2, Fdx1l - ferredoxin 1-like, Ahcy - s-adenosylhomocysteine hydrolase, Ptbp1 - polypyrimidine tract binding protein 1, Stra13 - stimulated by retinoic acid 13, Psmb6 - proteasome (prosome, mac…
GO:0044249	cellular biosynthetic process	4.15e-27	8.99e-24	2.06	19534	3094	647	211	[Fasn - fatty acid synthase, Suv39h1 - suppressor of variegation 3-9 homolog 1 (drosophila), 2410016O06Rik - riken cdna 2410016o06 gene, Prmt5 - protein arginine n-methyltransferase 5, Chchd1 - coiled-coil-helix-coiled-coil-helix domain containing 1, Eif5a2 - eukaryotic translation initiation factor 5a2, Commd2 - comm domain containing 2, Ahcy - s-adenosylhomocysteine hydrolase, Chchd10 - coiled-…
GO:0044237	cellular metabolic process	8.25e-27	1.56e-23	1.58	19534	6822	647	357	[Fasn - fatty acid synthase, Apoa1bp - apolipoprotein a-i binding protein, Suv39h1 - suppressor of variegation 3-9 homolog 1 (drosophila), 2410016O06Rik - riken cdna 2410016o06 gene, Prmt5 - protein arginine n-methyltransferase 5, Chchd1 - coiled-coil-helix-coiled-coil-helix domain containing 1, Eif5a2 - eukaryotic translation initiation factor 5a2, Commd2 - comm domain containing 2, Ahcy - s-ade…
GO:0065003	protein-containing complex assembly	1.11e-25	1.87e-22	2.86	19534	1233	647	117	[Apoa1bp - apolipoprotein a-i binding protein, Chrnb4 - cholinergic receptor, nicotinic, beta polypeptide 4, Hist2h3c1 - histone cluster 2, h3c1, Mrps7 - mitchondrial ribosomal protein s7, Snrpf - small nuclear ribonucleoprotein polypeptide f, Clpp - clpp caseinolytic peptidase, atp-dependent, proteolytic subunit, Prmt5 - protein arginine n-methyltransferase 5, Ndufa11 - nadh dehydrogenase (ubiqu…
GO:0043933	protein-containing complex subunit organization	1.83e-24	2.77e-21	2.67	19534	1403	647	124	[Apoa1bp - apolipoprotein a-i binding protein, Chrnb4 - cholinergic receptor, nicotinic, beta polypeptide 4, Hist2h3c1 - histone cluster 2, h3c1, Mrps7 - mitchondrial ribosomal protein s7, Snrpf - small nuclear ribonucleoprotein polypeptide f, Clpp - clpp caseinolytic peptidase, atp-dependent, proteolytic subunit, Prmt5 - protein arginine n-methyltransferase 5, Ndufa11 - nadh dehydrogenase (ubiqu…
GO:0006412	translation	7.81e-23	1.08e-19	6.09	19534	223	647	45	[Mrps18b - mitochondrial ribosomal protein s18b, Qrsl1 - glutaminyl-trna synthase (glutamine-hydrolyzing)-like 1, Rpl17 - ribosomal protein l17, Mrps7 - mitchondrial ribosomal protein s7, Rpl15 - ribosomal protein l15, Rps23 - ribosomal protein s23, Rps7 - ribosomal protein s7, Tufm - tu translation elongation factor, mitochondrial, Chchd1 - coiled-coil-helix-coiled-coil-helix domain containing 1…
GO:0006334	nucleosome assembly	1.58e-22	2e-19	10.68	19534	82	647	29	[Hist1h4b - histone cluster 1, h4b, Hist2h2bb - histone cluster 2, h2bb, Hist2h3c1 - histone cluster 2, h3c1, Hist3h2ba - histone cluster 3, h2ba, Hist1h2bh - histone cluster 1, h2bh, Hist1h2bm - histone cluster 1, h2bm, Hist1h4m - histone cluster 1, h4m, Hist1h1b - histone cluster 1, h1b, Hist1h1a - histone cluster 1, h1a, Cenpa - centromere protein a, Chaf1a - chromatin assembly factor 1, subun…
GO:0065004	protein-DNA complex assembly	2.41e-22	2.81e-19	8.41	19534	122	647	34	[Hist1h4b - histone cluster 1, h4b, Hist2h2bb - histone cluster 2, h2bb, Hist2h3c1 - histone cluster 2, h3c1, Hist3h2ba - histone cluster 3, h2ba, Hist1h2bh - histone cluster 1, h2bh, Hist1h2bm - histone cluster 1, h2bm, Hist1h4m - histone cluster 1, h4m, Hist1h1b - histone cluster 1, h1b, Hist1h1a - histone cluster 1, h1a, Chaf1a - chromatin assembly factor 1, subunit a (p150), Cenpa - centromer…
GO:0043604	amide biosynthetic process	2.48e-22	2.68e-19	4.97	19534	322	647	53	[Mrps18b - mitochondrial ribosomal protein s18b, Qrsl1 - glutaminyl-trna synthase (glutamine-hydrolyzing)-like 1, Mrps7 - mitchondrial ribosomal protein s7, Chchd1 - coiled-coil-helix-coiled-coil-helix domain containing 1, Tufm - tu translation elongation factor, mitochondrial, Eif5a2 - eukaryotic translation initiation factor 5a2, Mrpl52 - mitochondrial ribosomal protein l52, Mrpl2 - mitochondri…
GO:0071704	organic substance metabolic process	2.89e-22	2.92e-19	1.5	19534	7210	647	358	[Fasn - fatty acid synthase, Apoa1bp - apolipoprotein a-i binding protein, Suv39h1 - suppressor of variegation 3-9 homolog 1 (drosophila), 2410016O06Rik - riken cdna 2410016o06 gene, Prmt5 - protein arginine n-methyltransferase 5, Chchd1 - coiled-coil-helix-coiled-coil-helix domain containing 1, Eif5a2 - eukaryotic translation initiation factor 5a2, Commd2 - comm domain containing 2, Ahcy - s-ade…
GO:0006807	nitrogen compound metabolic process	5.3e-22	5.02e-19	1.55	19534	6389	647	328	[Fasn - fatty acid synthase, Apoa1bp - apolipoprotein a-i binding protein, Suv39h1 - suppressor of variegation 3-9 homolog 1 (drosophila), 2410016O06Rik - riken cdna 2410016o06 gene, Prmt5 - protein arginine n-methyltransferase 5, Chchd1 - coiled-coil-helix-coiled-coil-helix domain containing 1, Eif5a2 - eukaryotic translation initiation factor 5a2, Commd2 - comm domain containing 2, Ahcy - s-ade…
GO:0034723	DNA replication-dependent nucleosome organization	1.28e-21	1.14e-18	23.33	19534	22	647	17	[Hist1h4d - histone cluster 1, h4d, Hist1h4b - histone cluster 1, h4b, Hist1h4f - histone cluster 1, h4f, Chaf1b - chromatin assembly factor 1, subunit b (p60), Hist1h4i - histone cluster 1, h4i, Hist2h4 - histone cluster 2, h4, Hist1h3g - histone cluster 1, h3g, Hist1h4n - histone cluster 1, h4n, Hist2h3c1 - histone cluster 2, h3c1, Asf1b - asf1 anti-silencing function 1 homolog b (s. cerevisiae…
GO:0006335	DNA replication-dependent nucleosome assembly	1.28e-21	1.07e-18	23.33	19534	22	647	17	[Hist1h4d - histone cluster 1, h4d, Hist1h4b - histone cluster 1, h4b, Hist1h4f - histone cluster 1, h4f, Chaf1b - chromatin assembly factor 1, subunit b (p60), Hist1h4i - histone cluster 1, h4i, Hist2h4 - histone cluster 2, h4, Hist1h3g - histone cluster 1, h3g, Hist1h4n - histone cluster 1, h4n, Hist2h3c1 - histone cluster 2, h3c1, Asf1b - asf1 anti-silencing function 1 homolog b (s. cerevisiae…
GO:0043043	peptide biosynthetic process	2.16e-21	1.72e-18	5.64	19534	241	647	45	[Mrps18b - mitochondrial ribosomal protein s18b, Qrsl1 - glutaminyl-trna synthase (glutamine-hydrolyzing)-like 1, Rpl17 - ribosomal protein l17, Mrps7 - mitchondrial ribosomal protein s7, Rpl15 - ribosomal protein l15, Rps23 - ribosomal protein s23, Rps7 - ribosomal protein s7, Tufm - tu translation elongation factor, mitochondrial, Chchd1 - coiled-coil-helix-coiled-coil-helix domain containing 1…
GO:0071824	protein-DNA complex subunit organization	2.49e-21	1.88e-18	7.07	19534	158	647	37	[Hist1h4b - histone cluster 1, h4b, Hist2h2bb - histone cluster 2, h2bb, Hist2h3c1 - histone cluster 2, h3c1, Hist3h2ba - histone cluster 3, h2ba, Hist1h2bh - histone cluster 1, h2bh, Hist1h2bm - histone cluster 1, h2bm, Hist1h4m - histone cluster 1, h4m, Hist1h1b - histone cluster 1, h1b, Hist1h1a - histone cluster 1, h1a, Cenpa - centromere protein a, Chaf1a - chromatin assembly factor 1, subun…
GO:0044238	primary metabolic process	2.82e-21	2.04e-18	1.51	19534	6868	647	343	[Fasn - fatty acid synthase, Apoa1bp - apolipoprotein a-i binding protein, Suv39h1 - suppressor of variegation 3-9 homolog 1 (drosophila), 2410016O06Rik - riken cdna 2410016o06 gene, Prmt5 - protein arginine n-methyltransferase 5, Chchd1 - coiled-coil-helix-coiled-coil-helix domain containing 1, Eif5a2 - eukaryotic translation initiation factor 5a2, Commd2 - comm domain containing 2, Ahcy - s-ade…
GO:0006260	DNA replication	3.94e-21	2.71e-18	7.78	19534	132	647	34	[Pcna - proliferating cell nuclear antigen, Chtf8 - ctf8, chromosome transmission fidelity factor 8, Mcm6 - minichromosome maintenance deficient 6 (mis5 homolog, s. pombe) (s. cerevisiae), Mcm7 - minichromosome maintenance deficient 7 (s. cerevisiae), Mcm4 - minichromosome maintenance deficient 4 homolog (s. cerevisiae), Mcm5 - minichromosome maintenance deficient 5, cell division cycle 46 (s. ce…
GO:0034728	nucleosome organization	5.16e-20	3.4e-17	8.14	19534	115	647	31	[Hist1h4b - histone cluster 1, h4b, Hist2h2bb - histone cluster 2, h2bb, Hist2h3c1 - histone cluster 2, h3c1, Hist3h2ba - histone cluster 3, h2ba, Hist1h2bh - histone cluster 1, h2bh, Hist1h2bm - histone cluster 1, h2bm, Hist1h4m - histone cluster 1, h4m, Hist1h1b - histone cluster 1, h1b, Hist1h1a - histone cluster 1, h1a, Chaf1a - chromatin assembly factor 1, subunit a (p150), Cenpa - centromer…
GO:0007049	cell cycle	6.43e-20	4.06e-17	3.22	19534	721	647	77	[Suv39h1 - suppressor of variegation 3-9 homolog 1 (drosophila), Cdca3 - cell division cycle associated 3, Nudc - nuclear distribution gene c homolog (aspergillus), Exo1 - exonuclease 1, Anapc16 - anaphase promoting complex subunit 16, Timeless - timeless circadian clock 1, Tubb6 - tubulin, beta 6 class v, Ran - ran, member ras oncogene family, H2afx - h2a histone family, member x, Lig1 - ligase …
GO:1901360	organic cyclic compound metabolic process	1.93e-19	1.17e-16	1.76	19534	3769	647	220	[Fasn - fatty acid synthase, Apoa1bp - apolipoprotein a-i binding protein, Suv39h1 - suppressor of variegation 3-9 homolog 1 (drosophila), 2410016O06Rik - riken cdna 2410016o06 gene, Prmt5 - protein arginine n-methyltransferase 5, Ahcy - s-adenosylhomocysteine hydrolase, Commd2 - comm domain containing 2, Chchd10 - coiled-coil-helix-coiled-coil-helix domain containing 10, Ptbp1 - polypyrimidine t…
GO:0043603	cellular amide metabolic process	2.39e-19	1.39e-16	3.59	19534	546	647	65	[Mrps18b - mitochondrial ribosomal protein s18b, Fasn - fatty acid synthase, Qrsl1 - glutaminyl-trna synthase (glutamine-hydrolyzing)-like 1, Mrps7 - mitchondrial ribosomal protein s7, Tufm - tu translation elongation factor, mitochondrial, Chchd1 - coiled-coil-helix-coiled-coil-helix domain containing 1, Mrpl52 - mitochondrial ribosomal protein l52, Eif5a2 - eukaryotic translation initiation fac…
GO:0022607	cellular component assembly	5.93e-19	3.33e-16	2.15	19534	1982	647	141	[Apoa1bp - apolipoprotein a-i binding protein, Chrnb4 - cholinergic receptor, nicotinic, beta polypeptide 4, Hist2h3c1 - histone cluster 2, h3c1, Trappc6a - trafficking protein particle complex 6a, Mrps7 - mitchondrial ribosomal protein s7, Snrpf - small nuclear ribonucleoprotein polypeptide f, Clpp - clpp caseinolytic peptidase, atp-dependent, proteolytic subunit, Prmt5 - protein arginine n-meth…
GO:0006518	peptide metabolic process	9.8e-19	5.3e-16	4.39	19534	344	647	50	[Mrps18b - mitochondrial ribosomal protein s18b, Qrsl1 - glutaminyl-trna synthase (glutamine-hydrolyzing)-like 1, Mrps7 - mitchondrial ribosomal protein s7, Chchd1 - coiled-coil-helix-coiled-coil-helix domain containing 1, Tufm - tu translation elongation factor, mitochondrial, Eif5a2 - eukaryotic translation initiation factor 5a2, Mrpl52 - mitochondrial ribosomal protein l52, Mrpl2 - mitochondri…
GO:0046483	heterocycle metabolic process	2.87e-18	1.5e-15	1.77	19534	3534	647	207	[Fasn - fatty acid synthase, Suv39h1 - suppressor of variegation 3-9 homolog 1 (drosophila), Apoa1bp - apolipoprotein a-i binding protein, 2410016O06Rik - riken cdna 2410016o06 gene, Prmt5 - protein arginine n-methyltransferase 5, Commd2 - comm domain containing 2, Ahcy - s-adenosylhomocysteine hydrolase, Chchd10 - coiled-coil-helix-coiled-coil-helix domain containing 10, Ptbp1 - polypyrimidine t…
GO:0006725	cellular aromatic compound metabolic process	3.64e-18	1.84e-15	1.76	19534	3590	647	209	[Fasn - fatty acid synthase, Suv39h1 - suppressor of variegation 3-9 homolog 1 (drosophila), Apoa1bp - apolipoprotein a-i binding protein, 2410016O06Rik - riken cdna 2410016o06 gene, Prmt5 - protein arginine n-methyltransferase 5, Ahcy - s-adenosylhomocysteine hydrolase, Commd2 - comm domain containing 2, Chchd10 - coiled-coil-helix-coiled-coil-helix domain containing 10, Ptbp1 - polypyrimidine t…
GO:0055086	nucleobase-containing small molecule metabolic process	2.53e-17	1.24e-14	3.69	19534	458	647	56	[Fasn - fatty acid synthase, Apoa1bp - apolipoprotein a-i binding protein, Pmm1 - phosphomannomutase 1, Tkt - transketolase, Stoml2 - stomatin (epb7.2)-like 2, Gpd2 - glycerol phosphate dehydrogenase 2, mitochondrial, Dut - deoxyuridine triphosphatase, Nme3 - nme/nm23 nucleoside diphosphate kinase 3, Nudt5 - nudix (nucleoside diphosphate linked moiety x)-type motif 5, Hint1 - histidine triad nucl…
GO:0009117	nucleotide metabolic process	5.3e-17	2.51e-14	3.93	19534	392	647	51	[Fasn - fatty acid synthase, Apoa1bp - apolipoprotein a-i binding protein, Tkt - transketolase, Stoml2 - stomatin (epb7.2)-like 2, Gpd2 - glycerol phosphate dehydrogenase 2, mitochondrial, Dut - deoxyuridine triphosphatase, Nme3 - nme/nm23 nucleoside diphosphate kinase 3, Nudt5 - nudix (nucleoside diphosphate linked moiety x)-type motif 5, Hint1 - histidine triad nucleotide binding protein 1, Dct…
GO:0006139	nucleobase-containing compound metabolic process	6.09e-17	2.8e-14	1.75	19534	3410	647	198	[Fasn - fatty acid synthase, Suv39h1 - suppressor of variegation 3-9 homolog 1 (drosophila), Apoa1bp - apolipoprotein a-i binding protein, 2410016O06Rik - riken cdna 2410016o06 gene, Prmt5 - protein arginine n-methyltransferase 5, Commd2 - comm domain containing 2, Ahcy - s-adenosylhomocysteine hydrolase, Chchd10 - coiled-coil-helix-coiled-coil-helix domain containing 10, Ptbp1 - polypyrimidine t…
GO:0019637	organophosphate metabolic process	1.03e-16	4.58e-14	3.03	19534	698	647	70	[Fasn - fatty acid synthase, Apoa1bp - apolipoprotein a-i binding protein, Tkt - transketolase, Gpd2 - glycerol phosphate dehydrogenase 2, mitochondrial, Isyna1 - myo-inositol 1-phosphate synthase a1, Stoml2 - stomatin (epb7.2)-like 2, Dut - deoxyuridine triphosphatase, Nudt5 - nudix (nucleoside diphosphate linked moiety x)-type motif 5, Nme3 - nme/nm23 nucleoside diphosphate kinase 3, Hint1 - hi…
GO:0006753	nucleoside phosphate metabolic process	1.12e-16	4.85e-14	3.86	19534	399	647	51	[Fasn - fatty acid synthase, Apoa1bp - apolipoprotein a-i binding protein, Tkt - transketolase, Stoml2 - stomatin (epb7.2)-like 2, Gpd2 - glycerol phosphate dehydrogenase 2, mitochondrial, Dut - deoxyuridine triphosphatase, Nme3 - nme/nm23 nucleoside diphosphate kinase 3, Nudt5 - nudix (nucleoside diphosphate linked moiety x)-type motif 5, Hint1 - histidine triad nucleotide binding protein 1, Dct…
GO:0009123	nucleoside monophosphate metabolic process	1.19e-15	5.01e-13	6.34	19534	138	647	29	[Stoml2 - stomatin (epb7.2)-like 2, Dut - deoxyuridine triphosphatase, Nudt5 - nudix (nucleoside diphosphate linked moiety x)-type motif 5, Pkm - pyruvate kinase, muscle, Dctd - dcmp deaminase, Tgfb1 - transforming growth factor, beta 1, Umps - uridine monophosphate synthetase, Atic - 5-aminoimidazole-4-carboxamide ribonucleotide formyltransferase/imp cyclohydrolase, Chchd10 - coiled-coil-helix-c…
GO:0044271	cellular nitrogen compound biosynthetic process	3.14e-15	1.28e-12	1.86	19534	2510	647	155	[Suv39h1 - suppressor of variegation 3-9 homolog 1 (drosophila), 2410016O06Rik - riken cdna 2410016o06 gene, Mrps7 - mitchondrial ribosomal protein s7, Prmt5 - protein arginine n-methyltransferase 5, Nudt5 - nudix (nucleoside diphosphate linked moiety x)-type motif 5, Chchd1 - coiled-coil-helix-coiled-coil-helix domain containing 1, Tufm - tu translation elongation factor, mitochondrial, Eif5a2 -…
GO:0006333	chromatin assembly or disassembly	3.65e-15	1.46e-12	10.62	19534	54	647	19	[Hist1h4d - histone cluster 1, h4d, Chaf1b - chromatin assembly factor 1, subunit b (p60), Hist1h4b - histone cluster 1, h4b, Hist1h4f - histone cluster 1, h4f, Hist1h3g - histone cluster 1, h3g, Hist1h4i - histone cluster 1, h4i, Hist2h4 - histone cluster 2, h4, Hist1h4n - histone cluster 1, h4n, Asf1b - asf1 anti-silencing function 1 homolog b (s. cerevisiae), Hist2h3c1 - histone cluster 2, h3c…
GO:0090407	organophosphate biosynthetic process	5.77e-15	2.24e-12	3.82	19534	364	647	46	[Tkt - transketolase, Stoml2 - stomatin (epb7.2)-like 2, Isyna1 - myo-inositol 1-phosphate synthase a1, Tamm41 - tam41, mitochondrial translocator assembly and maintenance protein, homolog (s. cerevisiae), Mthfd1 - methylenetetrahydrofolate dehydrogenase (nadp+ dependent), methenyltetrahydrofolate cyclohydrolase, formyltetrahydrofolate synthase, Dut - deoxyuridine triphosphatase, Agpat5 - 1-acylg…
GO:0071840	cellular component organization or biogenesis	8.66e-15	3.28e-12	1.58	19534	4410	647	231	[Apoa1bp - apolipoprotein a-i binding protein, Suv39h1 - suppressor of variegation 3-9 homolog 1 (drosophila), 2410016O06Rik - riken cdna 2410016o06 gene, Calm3 - calmodulin 3, Hist2h3c1 - histone cluster 2, h3c1, Prmt5 - protein arginine n-methyltransferase 5, Chchd10 - coiled-coil-helix-coiled-coil-helix domain containing 10, Coro1c - coronin, actin binding protein 1c, Mrpl17 - mitochondrial ri…
GO:0006259	DNA metabolic process	8.77e-15	3.24e-12	3.01	19534	622	647	62	[Endog - endonuclease g, Snrnp40 - small nuclear ribonucleoprotein 40 (u5), Exo1 - exonuclease 1, Timeless - timeless circadian clock 1, H2afx - h2a histone family, member x, Lig1 - ligase i, dna, atp-dependent, Gins3 - gins complex subunit 3 (psf3 homolog), Fzr1 - fizzy/cell division cycle 20 related 1 (drosophila), Stra13 - stimulated by retinoic acid 13, Dctpp1 - dctp pyrophosphatase 1, Chaf1b…
GO:1901564	organonitrogen compound metabolic process	3.45e-14	1.24e-11	1.61	19534	3975	647	212	[Fasn - fatty acid synthase, Apoa1bp - apolipoprotein a-i binding protein, Suv39h1 - suppressor of variegation 3-9 homolog 1 (drosophila), 2410016O06Rik - riken cdna 2410016o06 gene, Prmt5 - protein arginine n-methyltransferase 5, Chchd1 - coiled-coil-helix-coiled-coil-helix domain containing 1, Eif5a2 - eukaryotic translation initiation factor 5a2, Ahcy - s-adenosylhomocysteine hydrolase, Chchd1…
GO:0009165	nucleotide biosynthetic process	6.4e-14	2.25e-11	4.95	19534	195	647	32	[Stoml2 - stomatin (epb7.2)-like 2, Mthfd1 - methylenetetrahydrofolate dehydrogenase (nadp+ dependent), methenyltetrahydrofolate cyclohydrolase, formyltetrahydrofolate synthase, Dut - deoxyuridine triphosphatase, Nme3 - nme/nm23 nucleoside diphosphate kinase 3, Rrm1 - ribonucleotide reductase m1, Tgfb1 - transforming growth factor, beta 1, Dctd - dcmp deaminase, Rrm2 - ribonucleotide reductase m2…
GO:0016043	cellular component organization	7.43e-14	2.56e-11	1.57	19534	4338	647	225	[Apoa1bp - apolipoprotein a-i binding protein, Suv39h1 - suppressor of variegation 3-9 homolog 1 (drosophila), 2410016O06Rik - riken cdna 2410016o06 gene, Calm3 - calmodulin 3, Hist2h3c1 - histone cluster 2, h3c1, Prmt5 - protein arginine n-methyltransferase 5, Chchd10 - coiled-coil-helix-coiled-coil-helix domain containing 10, Coro1c - coronin, actin binding protein 1c, Mrpl17 - mitochondrial ri…
GO:1901137	carbohydrate derivative biosynthetic process	1.55e-13	5.23e-11	3.83	19534	323	647	41	[Pmm1 - phosphomannomutase 1, Tkt - transketolase, Stoml2 - stomatin (epb7.2)-like 2, Dut - deoxyuridine triphosphatase, Nme3 - nme/nm23 nucleoside diphosphate kinase 3, Rrm1 - ribonucleotide reductase m1, Rrm2 - ribonucleotide reductase m2, Dctd - dcmp deaminase, Tgfb1 - transforming growth factor, beta 1, Pkm - pyruvate kinase, muscle, Umps - uridine monophosphate synthetase, Atic - 5-aminoimid…
GO:1901293	nucleoside phosphate biosynthetic process	1.76e-13	5.78e-11	4.78	19534	202	647	32	[Stoml2 - stomatin (epb7.2)-like 2, Mthfd1 - methylenetetrahydrofolate dehydrogenase (nadp+ dependent), methenyltetrahydrofolate cyclohydrolase, formyltetrahydrofolate synthase, Dut - deoxyuridine triphosphatase, Nme3 - nme/nm23 nucleoside diphosphate kinase 3, Rrm1 - ribonucleotide reductase m1, Tgfb1 - transforming growth factor, beta 1, Dctd - dcmp deaminase, Rrm2 - ribonucleotide reductase m2…
GO:0051290	protein heterotetramerization	2.02e-13	6.5e-11	11.23	19534	43	647	16	[Hist1h4d - histone cluster 1, h4d, Hist1h4b - histone cluster 1, h4b, Hist1h4f - histone cluster 1, h4f, Hist1h4i - histone cluster 1, h4i, Hist2h4 - histone cluster 2, h4, Hist1h3g - histone cluster 1, h3g, Hist1h4n - histone cluster 1, h4n, Hist2h3c1 - histone cluster 2, h3c1, Hist1h3d - histone cluster 1, h3d, Rrm1 - ribonucleotide reductase m1, Rrm2 - ribonucleotide reductase m2, Hist2h3b - …
GO:0009124	nucleoside monophosphate biosynthetic process	2.05e-13	6.46e-11	7.22	19534	92	647	22	[Stoml2 - stomatin (epb7.2)-like 2, Pgam2 - phosphoglycerate mutase 2, Atp5e - atp synthase, h+ transporting, mitochondrial f1 complex, epsilon subunit, Dut - deoxyuridine triphosphatase, AI462493 - expressed sequence ai462493, Tgfb1 - transforming growth factor, beta 1, Pkm - pyruvate kinase, muscle, Dctd - dcmp deaminase, Umps - uridine monophosphate synthetase, Aldoa - aldolase a, fructose-bis…
GO:0051276	chromosome organization	5.11e-13	1.58e-10	4.03	19534	277	647	37	[Pcna - proliferating cell nuclear antigen, Suv39h1 - suppressor of variegation 3-9 homolog 1 (drosophila), Cenpn - centromere protein n, Mcm6 - minichromosome maintenance deficient 6 (mis5 homolog, s. pombe) (s. cerevisiae), Phb2 - prohibitin 2, Mcm7 - minichromosome maintenance deficient 7 (s. cerevisiae), Mcm4 - minichromosome maintenance deficient 4 homolog (s. cerevisiae), Cenpw - centromere…
GO:0009161	ribonucleoside monophosphate metabolic process	5.39e-13	1.63e-10	5.94	19534	127	647	25	[Stoml2 - stomatin (epb7.2)-like 2, Nudt5 - nudix (nucleoside diphosphate linked moiety x)-type motif 5, Pkm - pyruvate kinase, muscle, Tgfb1 - transforming growth factor, beta 1, Umps - uridine monophosphate synthetase, Atic - 5-aminoimidazole-4-carboxamide ribonucleotide formyltransferase/imp cyclohydrolase, Atp5o - atp synthase, h+ transporting, mitochondrial f1 complex, o subunit, Chchd10 - c…
GO:0009167	purine ribonucleoside monophosphate metabolic process	1.93e-12	5.72e-10	5.89	19534	123	647	24	[Stoml2 - stomatin (epb7.2)-like 2, Pgam2 - phosphoglycerate mutase 2, Atp5e - atp synthase, h+ transporting, mitochondrial f1 complex, epsilon subunit, Nudt5 - nudix (nucleoside diphosphate linked moiety x)-type motif 5, AI462493 - expressed sequence ai462493, Tgfb1 - transforming growth factor, beta 1, Pkm - pyruvate kinase, muscle, Aldoa - aldolase a, fructose-bisphosphate, Atic - 5-aminoimida…
GO:0044283	small molecule biosynthetic process	2.32e-12	6.74e-10	3.19	19534	445	647	47	[Fasn - fatty acid synthase, Scd1 - stearoyl-coenzyme a desaturase 1, Gpd2 - glycerol phosphate dehydrogenase 2, mitochondrial, Isyna1 - myo-inositol 1-phosphate synthase a1, Psph - phosphoserine phosphatase, Dut - deoxyuridine triphosphatase, Pycrl - pyrroline-5-carboxylate reductase-like, Mthfd1 - methylenetetrahydrofolate dehydrogenase (nadp+ dependent), methenyltetrahydrofolate cyclohydrolase…
GO:0009126	purine nucleoside monophosphate metabolic process	2.32e-12	6.62e-10	5.84	19534	124	647	24	[Stoml2 - stomatin (epb7.2)-like 2, Pgam2 - phosphoglycerate mutase 2, Atp5e - atp synthase, h+ transporting, mitochondrial f1 complex, epsilon subunit, Nudt5 - nudix (nucleoside diphosphate linked moiety x)-type motif 5, AI462493 - expressed sequence ai462493, Tgfb1 - transforming growth factor, beta 1, Pkm - pyruvate kinase, muscle, Aldoa - aldolase a, fructose-bisphosphate, Atic - 5-aminoimida…
GO:0006325	chromatin organization	2.34e-12	6.57e-10	2.86	19534	580	647	55	[Suv39h1 - suppressor of variegation 3-9 homolog 1 (drosophila), Ccdc101 - coiled-coil domain containing 101, 2410016O06Rik - riken cdna 2410016o06 gene, Pole4 - polymerase (dna-directed), epsilon 4 (p12 subunit), Hist2h3c1 - histone cluster 2, h3c1, Pih1d1 - pih1 domain containing 1, Prmt5 - protein arginine n-methyltransferase 5, Nudt5 - nudix (nucleoside diphosphate linked moiety x)-type motif…
GO:1901135	carbohydrate derivative metabolic process	4.24e-12	1.17e-09	2.7	19534	660	647	59	[Fasn - fatty acid synthase, Pmm1 - phosphomannomutase 1, Tkt - transketolase, Gpd2 - glycerol phosphate dehydrogenase 2, mitochondrial, Stoml2 - stomatin (epb7.2)-like 2, Dut - deoxyuridine triphosphatase, Nme3 - nme/nm23 nucleoside diphosphate kinase 3, Nudt5 - nudix (nucleoside diphosphate linked moiety x)-type motif 5, Hint1 - histidine triad nucleotide binding protein 1, Pkm - pyruvate kinas…
GO:0006163	purine nucleotide metabolic process	9.39e-12	2.54e-09	3.75	19534	290	647	36	[Fasn - fatty acid synthase, Stoml2 - stomatin (epb7.2)-like 2, Mthfd1 - methylenetetrahydrofolate dehydrogenase (nadp+ dependent), methenyltetrahydrofolate cyclohydrolase, formyltetrahydrofolate synthase, Nme3 - nme/nm23 nucleoside diphosphate kinase 3, Nudt5 - nudix (nucleoside diphosphate linked moiety x)-type motif 5, Hint1 - histidine triad nucleotide binding protein 1, Tgfb1 - transforming …
GO:0072522	purine-containing compound biosynthetic process	1.02e-11	2.71e-09	5.03	19534	156	647	26	[Stoml2 - stomatin (epb7.2)-like 2, Mthfd1 - methylenetetrahydrofolate dehydrogenase (nadp+ dependent), methenyltetrahydrofolate cyclohydrolase, formyltetrahydrofolate synthase, Nme3 - nme/nm23 nucleoside diphosphate kinase 3, Pkm - pyruvate kinase, muscle, Tgfb1 - transforming growth factor, beta 1, Atic - 5-aminoimidazole-4-carboxamide ribonucleotide formyltransferase/imp cyclohydrolase, Atp5o …
GO:0044281	small molecule metabolic process	1.08e-11	2.81e-09	2.06	19534	1394	647	95	[Fasn - fatty acid synthase, Apoa1bp - apolipoprotein a-i binding protein, Ccbl2 - cysteine conjugate-beta lyase 2, Pmm1 - phosphomannomutase 1, Tkt - transketolase, Scd1 - stearoyl-coenzyme a desaturase 1, Gpd2 - glycerol phosphate dehydrogenase 2, mitochondrial, Qrsl1 - glutaminyl-trna synthase (glutamine-hydrolyzing)-like 1, Isyna1 - myo-inositol 1-phosphate synthase a1, Stoml2 - stomatin (epb…
GO:0009141	nucleoside triphosphate metabolic process	1.62e-11	4.15e-09	5.13	19534	147	647	25	[Stoml2 - stomatin (epb7.2)-like 2, Dut - deoxyuridine triphosphatase, Nudt5 - nudix (nucleoside diphosphate linked moiety x)-type motif 5, Nme3 - nme/nm23 nucleoside diphosphate kinase 3, Pkm - pyruvate kinase, muscle, Tgfb1 - transforming growth factor, beta 1, Atp5o - atp synthase, h+ transporting, mitochondrial f1 complex, o subunit, Chchd10 - coiled-coil-helix-coiled-coil-helix domain contai…
GO:0019693	ribose phosphate metabolic process	2.29e-11	5.78e-09	3.64	19534	299	647	36	[Fasn - fatty acid synthase, Tkt - transketolase, Stoml2 - stomatin (epb7.2)-like 2, Nme3 - nme/nm23 nucleoside diphosphate kinase 3, Nudt5 - nudix (nucleoside diphosphate linked moiety x)-type motif 5, Hint1 - histidine triad nucleotide binding protein 1, Tgfb1 - transforming growth factor, beta 1, Pkm - pyruvate kinase, muscle, Umps - uridine monophosphate synthetase, Atic - 5-aminoimidazole-4-…
GO:0072521	purine-containing compound metabolic process	2.67e-11	6.63e-09	3.47	19534	331	647	38	[Fasn - fatty acid synthase, Stoml2 - stomatin (epb7.2)-like 2, Mthfd1 - methylenetetrahydrofolate dehydrogenase (nadp+ dependent), methenyltetrahydrofolate cyclohydrolase, formyltetrahydrofolate synthase, Nme3 - nme/nm23 nucleoside diphosphate kinase 3, Nudt5 - nudix (nucleoside diphosphate linked moiety x)-type motif 5, Hint1 - histidine triad nucleotide binding protein 1, Tgfb1 - transforming …
GO:0045653	negative regulation of megakaryocyte differentiation	2.88e-11	7.05e-09	20.9	19534	13	647	9	[Hist1h4d - histone cluster 1, h4d, Hist4h4 - histone cluster 4, h4, Hist1h4b - histone cluster 1, h4b, Hist1h4f - histone cluster 1, h4f, Hist1h4i - histone cluster 1, h4i, Hist2h4 - histone cluster 2, h4, Hist1h4m - histone cluster 1, h4m, Hist1h4n - histone cluster 1, h4n, Hist1h4c - histone cluster 1, h4c]
GO:0009156	ribonucleoside monophosphate biosynthetic process	3.24e-11	7.78e-09	6.75	19534	85	647	19	[Stoml2 - stomatin (epb7.2)-like 2, Pgam2 - phosphoglycerate mutase 2, Atp5e - atp synthase, h+ transporting, mitochondrial f1 complex, epsilon subunit, AI462493 - expressed sequence ai462493, Pkm - pyruvate kinase, muscle, Tgfb1 - transforming growth factor, beta 1, Umps - uridine monophosphate synthetase, Aldoa - aldolase a, fructose-bisphosphate, Atic - 5-aminoimidazole-4-carboxamide ribonucle…
GO:0009059	macromolecule biosynthetic process	3.29e-11	7.78e-09	1.75	19534	2329	647	135	[Suv39h1 - suppressor of variegation 3-9 homolog 1 (drosophila), 2410016O06Rik - riken cdna 2410016o06 gene, Mrps7 - mitchondrial ribosomal protein s7, Prmt5 - protein arginine n-methyltransferase 5, Tufm - tu translation elongation factor, mitochondrial, Chchd1 - coiled-coil-helix-coiled-coil-helix domain containing 1, Eif5a2 - eukaryotic translation initiation factor 5a2, Commd2 - comm domain c…
GO:0006164	purine nucleotide biosynthetic process	3.44e-11	8.02e-09	4.97	19534	152	647	25	[Stoml2 - stomatin (epb7.2)-like 2, Mthfd1 - methylenetetrahydrofolate dehydrogenase (nadp+ dependent), methenyltetrahydrofolate cyclohydrolase, formyltetrahydrofolate synthase, Nme3 - nme/nm23 nucleoside diphosphate kinase 3, Pkm - pyruvate kinase, muscle, Tgfb1 - transforming growth factor, beta 1, Atic - 5-aminoimidazole-4-carboxamide ribonucleotide formyltransferase/imp cyclohydrolase, Atp5o …
GO:0034404	nucleobase-containing small molecule biosynthetic process	4.17e-11	9.57e-09	5.93	19534	107	647	21	[Dctpp1 - dctp pyrophosphatase 1, Pnp - purine-nucleoside phosphorylase, Dnph1 - 2'-deoxynucleoside 5'-phosphate n-hydrolase 1, Pgam2 - phosphoglycerate mutase 2, Nudt1 - nudix (nucleoside diphosphate linked moiety x)-type motif 1, Dut - deoxyuridine triphosphatase, Nudt5 - nudix (nucleoside diphosphate linked moiety x)-type motif 5, Nme3 - nme/nm23 nucleoside diphosphate kinase 3, Hint1 - histid…
GO:0046390	ribose phosphate biosynthetic process	7.1e-11	1.6e-08	4.81	19534	157	647	25	[Tkt - transketolase, Stoml2 - stomatin (epb7.2)-like 2, Nme3 - nme/nm23 nucleoside diphosphate kinase 3, Pkm - pyruvate kinase, muscle, Tgfb1 - transforming growth factor, beta 1, Umps - uridine monophosphate synthetase, Atic - 5-aminoimidazole-4-carboxamide ribonucleotide formyltransferase/imp cyclohydrolase, Atp5o - atp synthase, h+ transporting, mitochondrial f1 complex, o subunit, Chchd10 - …
GO:0022402	cell cycle process	7.31e-11	1.63e-08	2.52	19534	708	647	59	[Calm3 - calmodulin 3, Phb2 - prohibitin 2, Exo1 - exonuclease 1, Timeless - timeless circadian clock 1, Ncaph2 - non-smc condensin ii complex, subunit h2, Skp2 - s-phase kinase-associated protein 2 (p45), Ran - ran, member ras oncogene family, Lig1 - ligase i, dna, atp-dependent, Ranbp1 - ran binding protein 1, Cdc20 - cell division cycle 20, Haus4 - haus augmin-like complex, subunit 4, Stra13 -…
GO:0006091	generation of precursor metabolites and energy	7.69e-11	1.69e-08	4.17	19534	210	647	29	[Ndufa8 - nadh dehydrogenase (ubiquinone) 1 alpha subcomplex, 8, Uqcrfs1 - ubiquinol-cytochrome c reductase, rieske iron-sulfur polypeptide 1, Ndufb8 - nadh dehydrogenase (ubiquinone) 1 beta subcomplex 8, Stoml2 - stomatin (epb7.2)-like 2, Pkm - pyruvate kinase, muscle, Fxn - frataxin, Atp5o - atp synthase, h+ transporting, mitochondrial f1 complex, o subunit, Chchd10 - coiled-coil-helix-coiled-c…
GO:0006336	DNA replication-independent nucleosome assembly	8.16e-11	1.77e-08	13.84	19534	24	647	11	[Hist1h4d - histone cluster 1, h4d, Hist4h4 - histone cluster 4, h4, Hist1h4f - histone cluster 1, h4f, Hist1h4b - histone cluster 1, h4b, Hist2h4 - histone cluster 2, h4, Hist1h4i - histone cluster 1, h4i, Hist1h4m - histone cluster 1, h4m, Hist1h4n - histone cluster 1, h4n, Asf1b - asf1 anti-silencing function 1 homolog b (s. cerevisiae), Pole3 - polymerase (dna directed), epsilon 3 (p17 subuni…
GO:0043170	macromolecule metabolic process	9.87e-11	2.11e-08	1.4	19534	5705	647	264	[Suv39h1 - suppressor of variegation 3-9 homolog 1 (drosophila), 2410016O06Rik - riken cdna 2410016o06 gene, Prmt5 - protein arginine n-methyltransferase 5, Chchd1 - coiled-coil-helix-coiled-coil-helix domain containing 1, Eif5a2 - eukaryotic translation initiation factor 5a2, Commd2 - comm domain containing 2, Skp2 - s-phase kinase-associated protein 2 (p45), Ptbp1 - polypyrimidine tract binding…
GO:0009259	ribonucleotide metabolic process	1.07e-10	2.24e-08	3.6	19534	285	647	34	[Fasn - fatty acid synthase, Stoml2 - stomatin (epb7.2)-like 2, Nme3 - nme/nm23 nucleoside diphosphate kinase 3, Nudt5 - nudix (nucleoside diphosphate linked moiety x)-type motif 5, Hint1 - histidine triad nucleotide binding protein 1, Tgfb1 - transforming growth factor, beta 1, Pkm - pyruvate kinase, muscle, Umps - uridine monophosphate synthetase, Atic - 5-aminoimidazole-4-carboxamide ribonucle…
GO:0009127	purine nucleoside monophosphate biosynthetic process	1.19e-10	2.46e-08	6.71	19534	81	647	18	[Stoml2 - stomatin (epb7.2)-like 2, Pgam2 - phosphoglycerate mutase 2, Atp5e - atp synthase, h+ transporting, mitochondrial f1 complex, epsilon subunit, AI462493 - expressed sequence ai462493, Pkm - pyruvate kinase, muscle, Tgfb1 - transforming growth factor, beta 1, Aldoa - aldolase a, fructose-bisphosphate, Atic - 5-aminoimidazole-4-carboxamide ribonucleotide formyltransferase/imp cyclohydrolas…
GO:0009168	purine ribonucleoside monophosphate biosynthetic process	1.19e-10	2.43e-08	6.71	19534	81	647	18	[Stoml2 - stomatin (epb7.2)-like 2, Pgam2 - phosphoglycerate mutase 2, Atp5e - atp synthase, h+ transporting, mitochondrial f1 complex, epsilon subunit, AI462493 - expressed sequence ai462493, Pkm - pyruvate kinase, muscle, Tgfb1 - transforming growth factor, beta 1, Aldoa - aldolase a, fructose-bisphosphate, Atic - 5-aminoimidazole-4-carboxamide ribonucleotide formyltransferase/imp cyclohydrolas…
GO:0034724	DNA replication-independent nucleosome organization	1.41e-10	2.85e-08	13.28	19534	25	647	11	[Hist1h4d - histone cluster 1, h4d, Hist4h4 - histone cluster 4, h4, Hist1h4f - histone cluster 1, h4f, Hist1h4b - histone cluster 1, h4b, Hist1h4i - histone cluster 1, h4i, Hist2h4 - histone cluster 2, h4, Hist1h4m - histone cluster 1, h4m, Hist1h4n - histone cluster 1, h4n, Asf1b - asf1 anti-silencing function 1 homolog b (s. cerevisiae), Pole3 - polymerase (dna directed), epsilon 3 (p17 subuni…
GO:0006270	DNA replication initiation	1.41e-10	2.82e-08	13.28	19534	25	647	11	[Mcm10 - minichromosome maintenance deficient 10 (s. cerevisiae), Cdc6 - cell division cycle 6, Pola2 - polymerase (dna directed), alpha 2, Mcm3 - minichromosome maintenance deficient 3 (s. cerevisiae), Mcm6 - minichromosome maintenance deficient 6 (mis5 homolog, s. pombe) (s. cerevisiae), Mcm2 - minichromosome maintenance deficient 2 mitotin (s. cerevisiae), Mcm7 - minichromosome maintenance def…
GO:0009150	purine ribonucleotide metabolic process	1.72e-10	3.39e-08	3.62	19534	275	647	33	[Fasn - fatty acid synthase, Stoml2 - stomatin (epb7.2)-like 2, Nme3 - nme/nm23 nucleoside diphosphate kinase 3, Nudt5 - nudix (nucleoside diphosphate linked moiety x)-type motif 5, Hint1 - histidine triad nucleotide binding protein 1, Tgfb1 - transforming growth factor, beta 1, Pkm - pyruvate kinase, muscle, Atic - 5-aminoimidazole-4-carboxamide ribonucleotide formyltransferase/imp cyclohydrolas…
GO:0009260	ribonucleotide biosynthetic process	1.77e-10	3.45e-08	4.8	19534	151	647	24	[Ppcs - phosphopantothenoylcysteine synthetase, Pnp - purine-nucleoside phosphorylase, Stoml2 - stomatin (epb7.2)-like 2, Pgam2 - phosphoglycerate mutase 2, Atp5e - atp synthase, h+ transporting, mitochondrial f1 complex, epsilon subunit, Nme3 - nme/nm23 nucleoside diphosphate kinase 3, AI462493 - expressed sequence ai462493, Tgfb1 - transforming growth factor, beta 1, Pkm - pyruvate kinase, musc…
GO:0034645	cellular macromolecule biosynthetic process	2.13e-10	4.08e-08	1.73	19534	2274	647	130	[Suv39h1 - suppressor of variegation 3-9 homolog 1 (drosophila), 2410016O06Rik - riken cdna 2410016o06 gene, Mrps7 - mitchondrial ribosomal protein s7, Prmt5 - protein arginine n-methyltransferase 5, Tufm - tu translation elongation factor, mitochondrial, Chchd1 - coiled-coil-helix-coiled-coil-helix domain containing 1, Eif5a2 - eukaryotic translation initiation factor 5a2, Commd2 - comm domain c…
GO:0009987	cellular process	2.65e-10	5.01e-08	1.16	19534	13201	647	508	[Apoa1bp - apolipoprotein a-i binding protein, Suv39h1 - suppressor of variegation 3-9 homolog 1 (drosophila), 2410016O06Rik - riken cdna 2410016o06 gene, Hist2h3c1 - histone cluster 2, h3c1, Eif5a2 - eukaryotic translation initiation factor 5a2, Coro1c - coronin, actin binding protein 1c, Ahcy - s-adenosylhomocysteine hydrolase, Ptbp1 - polypyrimidine tract binding protein 1, Stra13 - stimulated…
GO:0009152	purine ribonucleotide biosynthetic process	2.89e-10	5.4e-08	4.89	19534	142	647	23	[Ppcs - phosphopantothenoylcysteine synthetase, Pnp - purine-nucleoside phosphorylase, Stoml2 - stomatin (epb7.2)-like 2, Pgam2 - phosphoglycerate mutase 2, Atp5e - atp synthase, h+ transporting, mitochondrial f1 complex, epsilon subunit, Nme3 - nme/nm23 nucleoside diphosphate kinase 3, AI462493 - expressed sequence ai462493, Tgfb1 - transforming growth factor, beta 1, Pkm - pyruvate kinase, musc…
GO:0009144	purine nucleoside triphosphate metabolic process	3.44e-10	6.36e-08	5.07	19534	131	647	22	[Pnp - purine-nucleoside phosphorylase, Stoml2 - stomatin (epb7.2)-like 2, Pgam2 - phosphoglycerate mutase 2, Nudt1 - nudix (nucleoside diphosphate linked moiety x)-type motif 1, Atp5e - atp synthase, h+ transporting, mitochondrial f1 complex, epsilon subunit, Nudt5 - nudix (nucleoside diphosphate linked moiety x)-type motif 5, Nme3 - nme/nm23 nucleoside diphosphate kinase 3, AI462493 - expressed…
GO:0044260	cellular macromolecule metabolic process	4.34e-10	7.93e-08	1.44	19534	4718	647	225	[Suv39h1 - suppressor of variegation 3-9 homolog 1 (drosophila), 2410016O06Rik - riken cdna 2410016o06 gene, Prmt5 - protein arginine n-methyltransferase 5, Chchd1 - coiled-coil-helix-coiled-coil-helix domain containing 1, Eif5a2 - eukaryotic translation initiation factor 5a2, Commd2 - comm domain containing 2, Skp2 - s-phase kinase-associated protein 2 (p45), Ptbp1 - polypyrimidine tract binding…
GO:1903047	mitotic cell cycle process	5.1e-10	9.2e-08	2.98	19534	416	647	41	[Pcna - proliferating cell nuclear antigen, Cetn4 - centrin 4, Calm3 - calmodulin 3, Poc1a - poc1 centriolar protein homolog a (chlamydomonas), Tgfb1 - transforming growth factor, beta 1, Cdca5 - cell division cycle associated 5, Taf10 - taf10 rna polymerase ii, tata box binding protein (tbp)-associated factor, Ncaph2 - non-smc condensin ii complex, subunit h2, Skp2 - s-phase kinase-associated pr…
GO:0051186	cofactor metabolic process	5.43e-10	9.68e-08	3.02	19534	400	647	40	[Fasn - fatty acid synthase, Ccbl2 - cysteine conjugate-beta lyase 2, Apoa1bp - apolipoprotein a-i binding protein, Tkt - transketolase, Gpd2 - glycerol phosphate dehydrogenase 2, mitochondrial, Mthfd1 - methylenetetrahydrofolate dehydrogenase (nadp+ dependent), methenyltetrahydrofolate cyclohydrolase, formyltetrahydrofolate synthase, Pkm - pyruvate kinase, muscle, Atic - 5-aminoimidazole-4-carbo…
GO:0022904	respiratory electron transport chain	1.91e-09	3.37e-07	7.08	19534	64	647	15	[Ndufa8 - nadh dehydrogenase (ubiquinone) 1 alpha subcomplex, 8, Uqcrfs1 - ubiquinol-cytochrome c reductase, rieske iron-sulfur polypeptide 1, Ndufb8 - nadh dehydrogenase (ubiquinone) 1 beta subcomplex 8, Sdhb - succinate dehydrogenase complex, subunit b, iron sulfur (ip), Uqcr10 - ubiquinol-cytochrome c reductase, complex iii subunit x, AI462493 - expressed sequence ai462493, Coq7 - demethyl-q 7…
GO:0033108	mitochondrial respiratory chain complex assembly	1.91e-09	3.33e-07	7.08	19534	64	647	15	[Ndufa8 - nadh dehydrogenase (ubiquinone) 1 alpha subcomplex, 8, Ndufb8 - nadh dehydrogenase (ubiquinone) 1 beta subcomplex 8, Mnf1 - mitochondrial nucleoid factor 1, Cox19 - cytochrome c oxidase assembly protein 19, 3110001D03Rik - riken cdna 3110001d03 gene, Ndufa11 - nadh dehydrogenase (ubiquinone) 1 alpha subcomplex 11, Uqcr10 - ubiquinol-cytochrome c reductase, complex iii subunit x, AI46249…
GO:0009262	deoxyribonucleotide metabolic process	3.31e-09	5.7e-07	10.38	19534	32	647	11	[Dctpp1 - dctp pyrophosphatase 1, Pnp - purine-nucleoside phosphorylase, Dtymk - deoxythymidylate kinase, Guk1 - guanylate kinase 1, Ada - adenosine deaminase, Nudt1 - nudix (nucleoside diphosphate linked moiety x)-type motif 1, Dut - deoxyuridine triphosphatase, Tyms - thymidylate synthase, Rrm1 - ribonucleotide reductase m1, Dctd - dcmp deaminase, Rrm2 - ribonucleotide reductase m2]
GO:0009205	purine ribonucleoside triphosphate metabolic process	3.91e-09	6.65e-07	4.91	19534	123	647	20	[Pnp - purine-nucleoside phosphorylase, Stoml2 - stomatin (epb7.2)-like 2, Pgam2 - phosphoglycerate mutase 2, Atp5e - atp synthase, h+ transporting, mitochondrial f1 complex, epsilon subunit, Nudt5 - nudix (nucleoside diphosphate linked moiety x)-type motif 5, Nme3 - nme/nm23 nucleoside diphosphate kinase 3, AI462493 - expressed sequence ai462493, Tgfb1 - transforming growth factor, beta 1, Pkm -…
GO:0051301	cell division	4.28e-09	7.21e-07	2.86	19534	412	647	39	[Ccdc124 - coiled-coil domain containing 124, Fam83d - family with sequence similarity 83, member d, Cdca3 - cell division cycle associated 3, Cenpw - centromere protein w, Nudc - nuclear distribution gene c homolog (aspergillus), Cdca5 - cell division cycle associated 5, Anapc16 - anaphase promoting complex subunit 16, Timeless - timeless circadian clock 1, Ran - ran, member ras oncogene family,…
GO:0022900	electron transport chain	4.7e-09	7.82e-07	6.66	19534	68	647	15	[Ndufa8 - nadh dehydrogenase (ubiquinone) 1 alpha subcomplex, 8, Uqcrfs1 - ubiquinol-cytochrome c reductase, rieske iron-sulfur polypeptide 1, Ndufb8 - nadh dehydrogenase (ubiquinone) 1 beta subcomplex 8, Sdhb - succinate dehydrogenase complex, subunit b, iron sulfur (ip), Uqcr10 - ubiquinol-cytochrome c reductase, complex iii subunit x, AI462493 - expressed sequence ai462493, Coq7 - demethyl-q 7…
GO:0045652	regulation of megakaryocyte differentiation	4.88e-09	8.03e-07	11.61	19534	26	647	10	[Hist1h4d - histone cluster 1, h4d, Hist4h4 - histone cluster 4, h4, Hist1h4f - histone cluster 1, h4f, Hist1h4b - histone cluster 1, h4b, Hist2h4 - histone cluster 2, h4, Hist1h4i - histone cluster 1, h4i, Hist1h4m - histone cluster 1, h4m, Hist1h4n - histone cluster 1, h4n, Eif6 - eukaryotic translation initiation factor 6, Hist1h4c - histone cluster 1, h4c]
GO:0009206	purine ribonucleoside triphosphate biosynthetic process	5.82e-09	9.49e-07	6.56	19534	69	647	15	[Pnp - purine-nucleoside phosphorylase, Stoml2 - stomatin (epb7.2)-like 2, Pgam2 - phosphoglycerate mutase 2, Atp5e - atp synthase, h+ transporting, mitochondrial f1 complex, epsilon subunit, Nme3 - nme/nm23 nucleoside diphosphate kinase 3, AI462493 - expressed sequence ai462493, Pkm - pyruvate kinase, muscle, Tgfb1 - transforming growth factor, beta 1, Aldoa - aldolase a, fructose-bisphosphate, …
GO:0009199	ribonucleoside triphosphate metabolic process	6.92e-09	1.11e-06	4.75	19534	127	647	20	[Pnp - purine-nucleoside phosphorylase, Stoml2 - stomatin (epb7.2)-like 2, Pgam2 - phosphoglycerate mutase 2, Atp5e - atp synthase, h+ transporting, mitochondrial f1 complex, epsilon subunit, Nudt5 - nudix (nucleoside diphosphate linked moiety x)-type motif 5, Nme3 - nme/nm23 nucleoside diphosphate kinase 3, AI462493 - expressed sequence ai462493, Tgfb1 - transforming growth factor, beta 1, Pkm -…
GO:0055114	oxidation-reduction process	7e-09	1.12e-06	2.23	19534	798	647	59	[Sdr39u1 - short chain dehydrogenase/reductase family 39u, member 1, Ndufa8 - nadh dehydrogenase (ubiquinone) 1 alpha subcomplex, 8, Fasn - fatty acid synthase, Ndufb8 - nadh dehydrogenase (ubiquinone) 1 beta subcomplex 8, Scd1 - stearoyl-coenzyme a desaturase 1, Gpd2 - glycerol phosphate dehydrogenase 2, mitochondrial, 2410016O06Rik - riken cdna 2410016o06 gene, Ndufa11 - nadh dehydrogenase (ubi…
GO:0051262	protein tetramerization	7.02e-09	1.11e-06	4.34	19534	153	647	22	[Dctpp1 - dctp pyrophosphatase 1, Hist1h4d - histone cluster 1, h4d, Hist1h4b - histone cluster 1, h4b, Apoa1bp - apolipoprotein a-i binding protein, Hist1h4f - histone cluster 1, h4f, Hist2h4 - histone cluster 2, h4, Hist1h3g - histone cluster 1, h3g, Hist1h4i - histone cluster 1, h4i, Cby1 - chibby homolog 1 (drosophila), Hist1h4n - histone cluster 1, h4n, Hist2h3c1 - histone cluster 2, h3c1, H…
GO:0009145	purine nucleoside triphosphate biosynthetic process	7.19e-09	1.12e-06	6.47	19534	70	647	15	[Pnp - purine-nucleoside phosphorylase, Stoml2 - stomatin (epb7.2)-like 2, Pgam2 - phosphoglycerate mutase 2, Atp5e - atp synthase, h+ transporting, mitochondrial f1 complex, epsilon subunit, Nme3 - nme/nm23 nucleoside diphosphate kinase 3, AI462493 - expressed sequence ai462493, Pkm - pyruvate kinase, muscle, Tgfb1 - transforming growth factor, beta 1, Aldoa - aldolase a, fructose-bisphosphate, …
GO:0006281	DNA repair	7.69e-09	1.19e-06	2.89	19534	386	647	37	[Pcna - proliferating cell nuclear antigen, Cdca5 - cell division cycle associated 5, Exo1 - exonuclease 1, Timeless - timeless circadian clock 1, H2afx - h2a histone family, member x, Lig1 - ligase i, dna, atp-dependent, Fzr1 - fizzy/cell division cycle 20 related 1 (drosophila), Stra13 - stimulated by retinoic acid 13, Chaf1a - chromatin assembly factor 1, subunit a (p150), Nsmce1 - non-smc ele…
GO:0006732	coenzyme metabolic process	8.37e-09	1.28e-06	3.42	19534	256	647	29	[Fasn - fatty acid synthase, Apoa1bp - apolipoprotein a-i binding protein, Tkt - transketolase, Gpd2 - glycerol phosphate dehydrogenase 2, mitochondrial, Mthfd1 - methylenetetrahydrofolate dehydrogenase (nadp+ dependent), methenyltetrahydrofolate cyclohydrolase, formyltetrahydrofolate synthase, Pkm - pyruvate kinase, muscle, Atic - 5-aminoimidazole-4-carboxamide ribonucleotide formyltransferase/i…
GO:0009201	ribonucleoside triphosphate biosynthetic process	1.08e-08	1.64e-06	6.29	19534	72	647	15	[Pnp - purine-nucleoside phosphorylase, Stoml2 - stomatin (epb7.2)-like 2, Pgam2 - phosphoglycerate mutase 2, Atp5e - atp synthase, h+ transporting, mitochondrial f1 complex, epsilon subunit, Nme3 - nme/nm23 nucleoside diphosphate kinase 3, AI462493 - expressed sequence ai462493, Pkm - pyruvate kinase, muscle, Tgfb1 - transforming growth factor, beta 1, Aldoa - aldolase a, fructose-bisphosphate, …
GO:0009142	nucleoside triphosphate biosynthetic process	1.15e-08	1.72e-06	5.82	19534	83	647	16	[Pnp - purine-nucleoside phosphorylase, Stoml2 - stomatin (epb7.2)-like 2, Pgam2 - phosphoglycerate mutase 2, Atp5e - atp synthase, h+ transporting, mitochondrial f1 complex, epsilon subunit, Nme3 - nme/nm23 nucleoside diphosphate kinase 3, AI462493 - expressed sequence ai462493, Pkm - pyruvate kinase, muscle, Tgfb1 - transforming growth factor, beta 1, Aldoa - aldolase a, fructose-bisphosphate, …
GO:1901292	nucleoside phosphate catabolic process	1.64e-08	2.44e-06	5.68	19534	85	647	16	[Dctpp1 - dctp pyrophosphatase 1, Pgam2 - phosphoglycerate mutase 2, Dnph1 - 2'-deoxynucleoside 5'-phosphate n-hydrolase 1, Dut - deoxyuridine triphosphatase, Nudt1 - nudix (nucleoside diphosphate linked moiety x)-type motif 1, Nudt5 - nudix (nucleoside diphosphate linked moiety x)-type motif 5, Hint1 - histidine triad nucleotide binding protein 1, Pkm - pyruvate kinase, muscle, Aldoa - aldolase …
GO:0006996	organelle organization	2.04e-08	3e-06	1.69	19534	1961	647	110	[Suv39h1 - suppressor of variegation 3-9 homolog 1 (drosophila), Calm3 - calmodulin 3, Trappc6a - trafficking protein particle complex 6a, Prmt5 - protein arginine n-methyltransferase 5, Ncaph2 - non-smc condensin ii complex, subunit h2, Chchd10 - coiled-coil-helix-coiled-coil-helix domain containing 10, Coro1c - coronin, actin binding protein 1c, Mrpl17 - mitochondrial ribosomal protein l17, Cdc…
GO:0071826	ribonucleoprotein complex subunit organization	2.44e-08	3.55e-06	3.77	19534	192	647	24	[C1qbp - complement component 1, q subcomponent binding protein, Nip7 - nuclear import 7 homolog (s. cerevisiae), Mpv17l2 - mpv17 mitochondrial membrane protein-like 2, Snrpf - small nuclear ribonucleoprotein polypeptide f, Mrps7 - mitchondrial ribosomal protein s7, Traf7 - tnf receptor-associated factor 7, Rps23 - ribosomal protein s23, Eif6 - eukaryotic translation initiation factor 6, Prmt5 - …
GO:0046034	ATP metabolic process	2.48e-08	3.58e-06	5.18	19534	99	647	17	[Stoml2 - stomatin (epb7.2)-like 2, Pgam2 - phosphoglycerate mutase 2, Atp5e - atp synthase, h+ transporting, mitochondrial f1 complex, epsilon subunit, Nudt5 - nudix (nucleoside diphosphate linked moiety x)-type motif 5, AI462493 - expressed sequence ai462493, Pkm - pyruvate kinase, muscle, Tgfb1 - transforming growth factor, beta 1, Aldoa - aldolase a, fructose-bisphosphate, Ldha - lactate dehy…
GO:0034655	nucleobase-containing compound catabolic process	2.9e-08	4.15e-06	3.41	19534	239	647	27	[Pycrl - pyrroline-5-carboxylate reductase-like, Dut - deoxyuridine triphosphatase, Nudt5 - nudix (nucleoside diphosphate linked moiety x)-type motif 5, Hint1 - histidine triad nucleotide binding protein 1, Endog - endonuclease g, Pkm - pyruvate kinase, muscle, Ahcy - s-adenosylhomocysteine hydrolase, Ptbp1 - polypyrimidine tract binding protein 1, Nudt4 - nudix (nucleoside diphosphate linked moi…
GO:0032543	mitochondrial translation	4.95e-08	7e-06	9.43	19534	32	647	10	[Mrps18b - mitochondrial ribosomal protein s18b, Mrps12 - mitochondrial ribosomal protein s12, Mrpl2 - mitochondrial ribosomal protein l2, Qrsl1 - glutaminyl-trna synthase (glutamine-hydrolyzing)-like 1, Mrps11 - mitochondrial ribosomal protein s11, Mrps15 - mitochondrial ribosomal protein s15, Chchd1 - coiled-coil-helix-coiled-coil-helix domain containing 1, Mrps17 - mitochondrial ribosomal prot…
GO:0000278	mitotic cell cycle	7.42e-08	1.04e-05	4.57	19534	119	647	18	[Aurkb - aurora kinase b, Tuba4a - tubulin, alpha 4a, Aurka - aurora kinase a, Tuba1b - tubulin, alpha 1b, Tubg1 - tubulin, gamma 1, Mybl2 - myeloblastosis oncogene-like 2, Ncapd2 - non-smc condensin i complex, subunit d2, Nup62 - nucleoporin 62, Cenpw - centromere protein w, Cdca5 - cell division cycle associated 5, Myb - myeloblastosis oncogene, Tubb6 - tubulin, beta 6 class v, Espl1 - extra sp…
GO:0006754	ATP biosynthetic process	7.79e-08	1.08e-05	6.43	19534	61	647	13	[Stoml2 - stomatin (epb7.2)-like 2, Pgam2 - phosphoglycerate mutase 2, Atp5e - atp synthase, h+ transporting, mitochondrial f1 complex, epsilon subunit, AI462493 - expressed sequence ai462493, Pkm - pyruvate kinase, muscle, Tgfb1 - transforming growth factor, beta 1, Aldoa - aldolase a, fructose-bisphosphate, Chchd10 - coiled-coil-helix-coiled-coil-helix domain containing 10, Atp5o - atp synthase…
GO:0009113	purine nucleobase biosynthetic process	9.95e-08	1.37e-05	20.13	19534	9	647	6	[Aprt - adenine phosphoribosyl transferase, Prps1 - phosphoribosyl pyrophosphate synthetase 1, Mthfd1l - methylenetetrahydrofolate dehydrogenase (nadp+ dependent) 1-like, Ada - adenosine deaminase, Mthfd1 - methylenetetrahydrofolate dehydrogenase (nadp+ dependent), methenyltetrahydrofolate cyclohydrolase, formyltetrahydrofolate synthase, Gart - phosphoribosylglycinamide formyltransferase]
GO:0046434	organophosphate catabolic process	1.06e-07	1.44e-05	4.25	19534	135	647	19	[Dctpp1 - dctp pyrophosphatase 1, Dnph1 - 2'-deoxynucleoside 5'-phosphate n-hydrolase 1, Pgam2 - phosphoglycerate mutase 2, Nudt1 - nudix (nucleoside diphosphate linked moiety x)-type motif 1, Dut - deoxyuridine triphosphatase, Nudt5 - nudix (nucleoside diphosphate linked moiety x)-type motif 5, Hint1 - histidine triad nucleotide binding protein 1, Pkm - pyruvate kinase, muscle, Aldoa - aldolase …
GO:0046148	pigment biosynthetic process	1.06e-07	1.43e-05	7.72	19534	43	647	11	[Fxn - frataxin, Urod - uroporphyrinogen decarboxylase, Alas1 - aminolevulinic acid synthase 1, Aprt - adenine phosphoribosyl transferase, Prps1 - phosphoribosyl pyrophosphate synthetase 1, Mthfd1l - methylenetetrahydrofolate dehydrogenase (nadp+ dependent) 1-like, Ada - adenosine deaminase, Mthfd1 - methylenetetrahydrofolate dehydrogenase (nadp+ dependent), methenyltetrahydrofolate cyclohydrolas…
GO:0009394	2'-deoxyribonucleotide metabolic process	1.25e-07	1.67e-05	10.06	19534	27	647	9	[Dctpp1 - dctp pyrophosphatase 1, Pnp - purine-nucleoside phosphorylase, Dtymk - deoxythymidylate kinase, Guk1 - guanylate kinase 1, Ada - adenosine deaminase, Nudt1 - nudix (nucleoside diphosphate linked moiety x)-type motif 1, Dut - deoxyuridine triphosphatase, Tyms - thymidylate synthase, Dctd - dcmp deaminase]
GO:0019692	deoxyribose phosphate metabolic process	1.25e-07	1.66e-05	10.06	19534	27	647	9	[Dctpp1 - dctp pyrophosphatase 1, Pnp - purine-nucleoside phosphorylase, Dtymk - deoxythymidylate kinase, Guk1 - guanylate kinase 1, Ada - adenosine deaminase, Nudt1 - nudix (nucleoside diphosphate linked moiety x)-type motif 1, Dut - deoxyuridine triphosphatase, Tyms - thymidylate synthase, Dctd - dcmp deaminase]
GO:0006974	cellular response to DNA damage stimulus	1.33e-07	1.76e-05	2.31	19534	602	647	46	[Crip1 - cysteine-rich protein 1 (intestinal), Pcna - proliferating cell nuclear antigen, Suv39h1 - suppressor of variegation 3-9 homolog 1 (drosophila), Mcm7 - minichromosome maintenance deficient 7 (s. cerevisiae), Exo1 - exonuclease 1, Cdca5 - cell division cycle associated 5, Timeless - timeless circadian clock 1, H2afx - h2a histone family, member x, Lig1 - ligase i, dna, atp-dependent, Fzr1…
GO:0009166	nucleotide catabolic process	1.44e-07	1.88e-05	5.64	19534	75	647	14	[Dctpp1 - dctp pyrophosphatase 1, Pgam2 - phosphoglycerate mutase 2, Dut - deoxyuridine triphosphatase, Nudt1 - nudix (nucleoside diphosphate linked moiety x)-type motif 1, Hint1 - histidine triad nucleotide binding protein 1, Pkm - pyruvate kinase, muscle, Aldoa - aldolase a, fructose-bisphosphate, Acot7 - acyl-coa thioesterase 7, Ldha - lactate dehydrogenase a, Nudt3 - nudix (nucleotide diphosp…
GO:0051291	protein heterooligomerization	1.52e-07	1.97e-05	3.97	19534	152	647	20	[Hist1h4d - histone cluster 1, h4d, Hist1h4b - histone cluster 1, h4b, Hist1h4f - histone cluster 1, h4f, Hist2h4 - histone cluster 2, h4, Hist1h4i - histone cluster 1, h4i, Hist1h3g - histone cluster 1, h3g, Chrnb4 - cholinergic receptor, nicotinic, beta polypeptide 4, Hist1h4n - histone cluster 1, h4n, Hist2h3c1 - histone cluster 2, h3c1, Hist1h3d - histone cluster 1, h3d, Nup62 - nucleoporin 6…
GO:0022618	ribonucleoprotein complex assembly	1.53e-07	1.97e-05	3.67	19534	181	647	22	[C1qbp - complement component 1, q subcomponent binding protein, Nip7 - nuclear import 7 homolog (s. cerevisiae), Mpv17l2 - mpv17 mitochondrial membrane protein-like 2, Mrps7 - mitchondrial ribosomal protein s7, Snrpf - small nuclear ribonucleoprotein polypeptide f, Traf7 - tnf receptor-associated factor 7, Rps23 - ribosomal protein s23, Prmt5 - protein arginine n-methyltransferase 5, Pih1d1 - pi…
GO:0051188	cofactor biosynthetic process	1.64e-07	2.09e-05	3.8	19534	167	647	21	[Ppcs - phosphopantothenoylcysteine synthetase, Pgam2 - phosphoglycerate mutase 2, Mthfd1 - methylenetetrahydrofolate dehydrogenase (nadp+ dependent), methenyltetrahydrofolate cyclohydrolase, formyltetrahydrofolate synthase, Tmem14c - transmembrane protein 14c, Pkm - pyruvate kinase, muscle, Aldoa - aldolase a, fructose-bisphosphate, Acot7 - acyl-coa thioesterase 7, Atic - 5-aminoimidazole-4-carb…
GO:0090304	nucleic acid metabolic process	1.92e-07	2.42e-05	1.49	19534	2972	647	147	[Suv39h1 - suppressor of variegation 3-9 homolog 1 (drosophila), 2410016O06Rik - riken cdna 2410016o06 gene, Snrpf - small nuclear ribonucleoprotein polypeptide f, Prmt5 - protein arginine n-methyltransferase 5, Commd2 - comm domain containing 2, Ptbp1 - polypyrimidine tract binding protein 1, Rpl14 - ribosomal protein l14, Fzr1 - fizzy/cell division cycle 20 related 1 (drosophila), Edf1 - endoth…
GO:0006120	mitochondrial electron transport, NADH to ubiquinone	2.16e-07	2.71e-05	14.09	19534	15	647	7	[Ndufa8 - nadh dehydrogenase (ubiquinone) 1 alpha subcomplex, 8, Ndufc2 - nadh dehydrogenase (ubiquinone) 1, subcomplex unknown, 2, Ndufb8 - nadh dehydrogenase (ubiquinone) 1 beta subcomplex 8, Ndufs8 - nadh dehydrogenase (ubiquinone) fe-s protein 8, Ndufv1 - nadh dehydrogenase (ubiquinone) flavoprotein 1, Ndufs6 - nadh dehydrogenase (ubiquinone) fe-s protein 6, Ndufa7 - nadh dehydrogenase (ubiqu…
GO:0046112	nucleobase biosynthetic process	2.16e-07	2.68e-05	14.09	19534	15	647	7	[Aprt - adenine phosphoribosyl transferase, Prps1 - phosphoribosyl pyrophosphate synthetase 1, Mthfd1l - methylenetetrahydrofolate dehydrogenase (nadp+ dependent) 1-like, Ada - adenosine deaminase, Mthfd1 - methylenetetrahydrofolate dehydrogenase (nadp+ dependent), methenyltetrahydrofolate cyclohydrolase, formyltetrahydrofolate synthase, Gart - phosphoribosylglycinamide formyltransferase, Umps - …
GO:0009263	deoxyribonucleotide biosynthetic process	2.16e-07	2.66e-05	14.09	19534	15	647	7	[Dtymk - deoxythymidylate kinase, Guk1 - guanylate kinase 1, Dut - deoxyuridine triphosphatase, Tyms - thymidylate synthase, Rrm1 - ribonucleotide reductase m1, Dctd - dcmp deaminase, Rrm2 - ribonucleotide reductase m2]
GO:0046654	tetrahydrofolate biosynthetic process	2.29e-07	2.8e-05	25.16	19534	6	647	5	[Mthfd1l - methylenetetrahydrofolate dehydrogenase (nadp+ dependent) 1-like, Mthfd1 - methylenetetrahydrofolate dehydrogenase (nadp+ dependent), methenyltetrahydrofolate cyclohydrolase, formyltetrahydrofolate synthase, Dhfr - dihydrofolate reductase, Gart - phosphoribosylglycinamide formyltransferase, Atic - 5-aminoimidazole-4-carboxamide ribonucleotide formyltransferase/imp cyclohydrolase]
GO:0006793	phosphorus metabolic process	3.7e-07	4.48e-05	1.7	19534	1594	647	90	[Fasn - fatty acid synthase, Apoa1bp - apolipoprotein a-i binding protein, Tkt - transketolase, Isyna1 - myo-inositol 1-phosphate synthase a1, Stoml2 - stomatin (epb7.2)-like 2, Gpd2 - glycerol phosphate dehydrogenase 2, mitochondrial, Dut - deoxyuridine triphosphatase, Nudt5 - nudix (nucleoside diphosphate linked moiety x)-type motif 5, Nme3 - nme/nm23 nucleoside diphosphate kinase 3, Hint1 - hi…
GO:0006796	phosphate-containing compound metabolic process	3.85e-07	4.63e-05	1.71	19534	1572	647	89	[Fasn - fatty acid synthase, Apoa1bp - apolipoprotein a-i binding protein, Tkt - transketolase, Isyna1 - myo-inositol 1-phosphate synthase a1, Stoml2 - stomatin (epb7.2)-like 2, Gpd2 - glycerol phosphate dehydrogenase 2, mitochondrial, Dut - deoxyuridine triphosphatase, Nudt5 - nudix (nucleoside diphosphate linked moiety x)-type motif 5, Nme3 - nme/nm23 nucleoside diphosphate kinase 3, Hint1 - hi…
GO:0010257	NADH dehydrogenase complex assembly	5.12e-07	6.1e-05	7.55	19534	40	647	10	[Ndufb2 - nadh dehydrogenase (ubiquinone) 1 beta subcomplex, 2, Ndufa8 - nadh dehydrogenase (ubiquinone) 1 alpha subcomplex, 8, Ndufc2 - nadh dehydrogenase (ubiquinone) 1, subcomplex unknown, 2, Ndufb8 - nadh dehydrogenase (ubiquinone) 1 beta subcomplex 8, 3110001D03Rik - riken cdna 3110001d03 gene, Ndufs8 - nadh dehydrogenase (ubiquinone) fe-s protein 8, Ndufs7 - nadh dehydrogenase (ubiquinone) …
GO:0032981	mitochondrial respiratory chain complex I assembly	5.12e-07	6.06e-05	7.55	19534	40	647	10	[Ndufb2 - nadh dehydrogenase (ubiquinone) 1 beta subcomplex, 2, Ndufa8 - nadh dehydrogenase (ubiquinone) 1 alpha subcomplex, 8, Ndufc2 - nadh dehydrogenase (ubiquinone) 1, subcomplex unknown, 2, Ndufb8 - nadh dehydrogenase (ubiquinone) 1 beta subcomplex 8, 3110001D03Rik - riken cdna 3110001d03 gene, Ndufs8 - nadh dehydrogenase (ubiquinone) fe-s protein 8, Ndufs7 - nadh dehydrogenase (ubiquinone) …
GO:0044270	cellular nitrogen compound catabolic process	5.14e-07	6.04e-05	2.96	19534	275	647	27	[Pycrl - pyrroline-5-carboxylate reductase-like, Dut - deoxyuridine triphosphatase, Nudt5 - nudix (nucleoside diphosphate linked moiety x)-type motif 5, Hint1 - histidine triad nucleotide binding protein 1, Endog - endonuclease g, Pkm - pyruvate kinase, muscle, Ahcy - s-adenosylhomocysteine hydrolase, Ptbp1 - polypyrimidine tract binding protein 1, Nudt4 - nudix (nucleoside diphosphate linked moi…
GO:0019439	aromatic compound catabolic process	5.5e-07	6.41e-05	2.89	19534	293	647	28	[Pycrl - pyrroline-5-carboxylate reductase-like, Dut - deoxyuridine triphosphatase, Nudt5 - nudix (nucleoside diphosphate linked moiety x)-type motif 5, Hint1 - histidine triad nucleotide binding protein 1, Endog - endonuclease g, Pkm - pyruvate kinase, muscle, Ahcy - s-adenosylhomocysteine hydrolase, Ptbp1 - polypyrimidine tract binding protein 1, Nudt4 - nudix (nucleoside diphosphate linked moi…
GO:0007005	mitochondrion organization	7.32e-07	8.46e-05	2.98	19534	263	647	26	[Chchd2 - coiled-coil-helix-coiled-coil-helix domain containing 2, Stoml2 - stomatin (epb7.2)-like 2, Slc25a4 - solute carrier family 25 (mitochondrial carrier, adenine nucleotide translocator), member 4, Phb2 - prohibitin 2, Fxn - frataxin, Chchd10 - coiled-coil-helix-coiled-coil-helix domain containing 10, Mrpl17 - mitochondrial ribosomal protein l17, Ndufs6 - nadh dehydrogenase (ubiquinone) fe…
GO:0046700	heterocycle catabolic process	7.34e-07	8.42e-05	2.91	19534	280	647	27	[Pycrl - pyrroline-5-carboxylate reductase-like, Dut - deoxyuridine triphosphatase, Nudt5 - nudix (nucleoside diphosphate linked moiety x)-type motif 5, Hint1 - histidine triad nucleotide binding protein 1, Endog - endonuclease g, Pkm - pyruvate kinase, muscle, Ahcy - s-adenosylhomocysteine hydrolase, Ptbp1 - polypyrimidine tract binding protein 1, Nudt4 - nudix (nucleoside diphosphate linked moi…
GO:0006271	DNA strand elongation involved in DNA replication	7.8e-07	8.89e-05	21.57	19534	7	647	5	[Pcna - proliferating cell nuclear antigen, Lig1 - ligase i, dna, atp-dependent, Pole - polymerase (dna directed), epsilon, Pold2 - polymerase (dna directed), delta 2, regulatory subunit, Gins1 - gins complex subunit 1 (psf1 homolog)]
GO:0046394	carboxylic acid biosynthetic process	8.96e-07	0.000101	3.03	19534	249	647	25	[Fasn - fatty acid synthase, Scd1 - stearoyl-coenzyme a desaturase 1, Psph - phosphoserine phosphatase, Pycrl - pyrroline-5-carboxylate reductase-like, Mthfd1 - methylenetetrahydrofolate dehydrogenase (nadp+ dependent), methenyltetrahydrofolate cyclohydrolase, formyltetrahydrofolate synthase, Pkm - pyruvate kinase, muscle, Atic - 5-aminoimidazole-4-carboxamide ribonucleotide formyltransferase/imp…
GO:0016053	organic acid biosynthetic process	9.65e-07	0.000108	3.02	19534	250	647	25	[Fasn - fatty acid synthase, Scd1 - stearoyl-coenzyme a desaturase 1, Psph - phosphoserine phosphatase, Pycrl - pyrroline-5-carboxylate reductase-like, Mthfd1 - methylenetetrahydrofolate dehydrogenase (nadp+ dependent), methenyltetrahydrofolate cyclohydrolase, formyltetrahydrofolate synthase, Pkm - pyruvate kinase, muscle, Atic - 5-aminoimidazole-4-carboxamide ribonucleotide formyltransferase/imp…
GO:1901361	organic cyclic compound catabolic process	1.11e-06	0.000123	2.73	19534	321	647	29	[Pycrl - pyrroline-5-carboxylate reductase-like, Dut - deoxyuridine triphosphatase, Nudt5 - nudix (nucleoside diphosphate linked moiety x)-type motif 5, Hint1 - histidine triad nucleotide binding protein 1, Endog - endonuclease g, Pkm - pyruvate kinase, muscle, Ahcy - s-adenosylhomocysteine hydrolase, Ptbp1 - polypyrimidine tract binding protein 1, Nudt4 - nudix (nucleoside diphosphate linked moi…
GO:0042440	pigment metabolic process	1.27e-06	0.00014	6.15	19534	54	647	11	[Fxn - frataxin, Urod - uroporphyrinogen decarboxylase, Alas1 - aminolevulinic acid synthase 1, Aprt - adenine phosphoribosyl transferase, Prps1 - phosphoribosyl pyrophosphate synthetase 1, Mthfd1l - methylenetetrahydrofolate dehydrogenase (nadp+ dependent) 1-like, Mthfd1 - methylenetetrahydrofolate dehydrogenase (nadp+ dependent), methenyltetrahydrofolate cyclohydrolase, formyltetrahydrofolate s…
GO:0009200	deoxyribonucleoside triphosphate metabolic process	1.51e-06	0.000165	11.12	19534	19	647	7	[Dctpp1 - dctp pyrophosphatase 1, Pnp - purine-nucleoside phosphorylase, Dtymk - deoxythymidylate kinase, Guk1 - guanylate kinase 1, Ada - adenosine deaminase, Nudt1 - nudix (nucleoside diphosphate linked moiety x)-type motif 1, Dut - deoxyuridine triphosphatase]
GO:0046653	tetrahydrofolate metabolic process	1.51e-06	0.000164	11.12	19534	19	647	7	[Mthfd1l - methylenetetrahydrofolate dehydrogenase (nadp+ dependent) 1-like, Shmt2 - serine hydroxymethyltransferase 2 (mitochondrial), Mthfd1 - methylenetetrahydrofolate dehydrogenase (nadp+ dependent), methenyltetrahydrofolate cyclohydrolase, formyltetrahydrofolate synthase, Dhfr - dihydrofolate reductase, Tyms - thymidylate synthase, Gart - phosphoribosylglycinamide formyltransferase, Atic - 5…
GO:0007051	spindle organization	1.77e-06	0.000191	4.09	19534	118	647	16	[Aurkb - aurora kinase b, Aurka - aurora kinase a, Haus8 - 4haus augmin-like complex, subunit 8, Tacc3 - transforming, acidic coiled-coil containing protein 3, Tubg1 - tubulin, gamma 1, Mybl2 - myeloblastosis oncogene-like 2, Poc1a - poc1 centriolar protein homolog a (chlamydomonas), Cenpw - centromere protein w, Espl1 - extra spindle poles-like 1 (s. cerevisiae), Ranbp1 - ran binding protein 1, …
GO:0042559	pteridine-containing compound biosynthetic process	1.81e-06	0.000195	13.93	19534	13	647	6	[Mthfd1l - methylenetetrahydrofolate dehydrogenase (nadp+ dependent) 1-like, Spr - sepiapterin reductase, Mthfd1 - methylenetetrahydrofolate dehydrogenase (nadp+ dependent), methenyltetrahydrofolate cyclohydrolase, formyltetrahydrofolate synthase, Dhfr - dihydrofolate reductase, Gart - phosphoribosylglycinamide formyltransferase, Atic - 5-aminoimidazole-4-carboxamide ribonucleotide formyltransfer…
GO:1900264	positive regulation of DNA-directed DNA polymerase activity	2.02e-06	0.000216	18.87	19534	8	647	5	[Dscc1 - defective in sister chromatid cohesion 1 homolog (s. cerevisiae), Chtf8 - ctf8, chromosome transmission fidelity factor 8, Rfc3 - replication factor c (activator 1) 3, Rfc4 - replication factor c (activator 1) 4, Chtf18 - ctf18, chromosome transmission fidelity factor 18]
GO:1900262	regulation of DNA-directed DNA polymerase activity	2.02e-06	0.000214	18.87	19534	8	647	5	[Dscc1 - defective in sister chromatid cohesion 1 homolog (s. cerevisiae), Chtf8 - ctf8, chromosome transmission fidelity factor 8, Rfc3 - replication factor c (activator 1) 3, Chtf18 - ctf18, chromosome transmission fidelity factor 18, Rfc4 - replication factor c (activator 1) 4]
GO:0006268	DNA unwinding involved in DNA replication	2.02e-06	0.000213	18.87	19534	8	647	5	[Rad51 - rad51 homolog, Mcm6 - minichromosome maintenance deficient 6 (mis5 homolog, s. pombe) (s. cerevisiae), Mcm2 - minichromosome maintenance deficient 2 mitotin (s. cerevisiae), Mcm7 - minichromosome maintenance deficient 7 (s. cerevisiae), Mcm4 - minichromosome maintenance deficient 4 homolog (s. cerevisiae)]
GO:0009396	folic acid-containing compound biosynthetic process	2.02e-06	0.000211	18.87	19534	8	647	5	[Mthfd1l - methylenetetrahydrofolate dehydrogenase (nadp+ dependent) 1-like, Mthfd1 - methylenetetrahydrofolate dehydrogenase (nadp+ dependent), methenyltetrahydrofolate cyclohydrolase, formyltetrahydrofolate synthase, Dhfr - dihydrofolate reductase, Gart - phosphoribosylglycinamide formyltransferase, Atic - 5-aminoimidazole-4-carboxamide ribonucleotide formyltransferase/imp cyclohydrolase]
GO:0006839	mitochondrial transport	3.25e-06	0.000337	4.4	19534	96	647	14	[Timm13 - translocase of inner mitochondrial membrane 13, Stoml2 - stomatin (epb7.2)-like 2, Timm8a1 - translocase of inner mitochondrial membrane 8a1, Fis1 - fission 1 (mitochondrial outer membrane) homolog (yeast), Smdt1 - single-pass membrane protein with aspartate rich tail 1, Timm50 - translocase of inner mitochondrial membrane 50, Timm22 - translocase of inner mitochondrial membrane 22, Tme…
GO:0009108	coenzyme biosynthetic process	3.43e-06	0.000353	3.9	19534	124	647	16	[Ppcs - phosphopantothenoylcysteine synthetase, Pgam2 - phosphoglycerate mutase 2, Mthfd1 - methylenetetrahydrofolate dehydrogenase (nadp+ dependent), methenyltetrahydrofolate cyclohydrolase, formyltetrahydrofolate synthase, Pkm - pyruvate kinase, muscle, Aldoa - aldolase a, fructose-bisphosphate, Acot7 - acyl-coa thioesterase 7, Atic - 5-aminoimidazole-4-carboxamide ribonucleotide formyltransfer…
GO:0009162	deoxyribonucleoside monophosphate metabolic process	4.43e-06	0.000453	16.77	19534	9	647	5	[Dnph1 - 2'-deoxynucleoside 5'-phosphate n-hydrolase 1, Guk1 - guanylate kinase 1, Dut - deoxyuridine triphosphatase, Tyms - thymidylate synthase, Dctd - dcmp deaminase]
GO:0051259	protein complex oligomerization	4.76e-06	0.000484	2.18	19534	540	647	39	[Hist1h4b - histone cluster 1, h4b, Apoa1bp - apolipoprotein a-i binding protein, Chrnb4 - cholinergic receptor, nicotinic, beta polypeptide 4, Stoml2 - stomatin (epb7.2)-like 2, Hist2h3c1 - histone cluster 2, h3c1, Dut - deoxyuridine triphosphatase, Clpp - clpp caseinolytic peptidase, atp-dependent, proteolytic subunit, Rrm1 - ribonucleotide reductase m1, Pkm - pyruvate kinase, muscle, Rrm2 - ri…
GO:0042558	pteridine-containing compound metabolic process	5.57e-06	0.000563	7.79	19534	31	647	8	[Spr - sepiapterin reductase, Mthfd1l - methylenetetrahydrofolate dehydrogenase (nadp+ dependent) 1-like, Shmt2 - serine hydroxymethyltransferase 2 (mitochondrial), Mthfd1 - methylenetetrahydrofolate dehydrogenase (nadp+ dependent), methenyltetrahydrofolate cyclohydrolase, formyltetrahydrofolate synthase, Dhfr - dihydrofolate reductase, Tyms - thymidylate synthase, Gart - phosphoribosylglycinamid…
GO:0090068	positive regulation of cell cycle process	5.74e-06	0.000576	2.97	19534	224	647	22	[Apex1 - apurinic/apyrimidinic endonuclease 1, Lmnb1 - lamin b1, Aurkb - aurora kinase b, Rpl17 - ribosomal protein l17, Fam83d - family with sequence similarity 83, member d, Phb2 - prohibitin 2, Fen1 - flap structure specific endonuclease 1, Poc1a - poc1 centriolar protein homolog a (chlamydomonas), Cdk1 - cyclin-dependent kinase 1, Nup62 - nucleoporin 62, Tgfb1 - transforming growth factor, be…
GO:0044267	cellular protein metabolic process	6.78e-06	0.000676	1.48	19534	2383	647	117	[Suv39h1 - suppressor of variegation 3-9 homolog 1 (drosophila), 2410016O06Rik - riken cdna 2410016o06 gene, Mrps7 - mitchondrial ribosomal protein s7, Prmt5 - protein arginine n-methyltransferase 5, Tufm - tu translation elongation factor, mitochondrial, Chchd1 - coiled-coil-helix-coiled-coil-helix domain containing 1, Eif5a2 - eukaryotic translation initiation factor 5a2, Pgp - phosphoglycolate…
GO:1901362	organic cyclic compound biosynthetic process	7.17e-06	0.00071	1.49	19534	2335	647	115	[Suv39h1 - suppressor of variegation 3-9 homolog 1 (drosophila), 2410016O06Rik - riken cdna 2410016o06 gene, Nudt5 - nudix (nucleoside diphosphate linked moiety x)-type motif 5, Prmt5 - protein arginine n-methyltransferase 5, Pkm - pyruvate kinase, muscle, Umps - uridine monophosphate synthetase, Commd2 - comm domain containing 2, Chchd10 - coiled-coil-helix-coiled-coil-helix domain containing 10…
GO:0002181	cytoplasmic translation	8.96e-06	0.000881	8.81	19534	24	647	7	[Mrpl2 - mitochondrial ribosomal protein l2, Rpl17 - ribosomal protein l17, Rpl31 - ribosomal protein l31, Eif4h - eukaryotic translation initiation factor 4h, Rpl7 - ribosomal protein l7, Rpl15 - ribosomal protein l15, Rps23 - ribosomal protein s23]
GO:0017144	drug metabolic process	9.06e-06	0.000885	2.26	19534	454	647	34	[Stoml2 - stomatin (epb7.2)-like 2, Pycrl - pyrroline-5-carboxylate reductase-like, Nudt5 - nudix (nucleoside diphosphate linked moiety x)-type motif 5, Tgfb1 - transforming growth factor, beta 1, Pkm - pyruvate kinase, muscle, Fxn - frataxin, Atp5o - atp synthase, h+ transporting, mitochondrial f1 complex, o subunit, Ahcy - s-adenosylhomocysteine hydrolase, Chchd10 - coiled-coil-helix-coiled-coi…
GO:0046496	nicotinamide nucleotide metabolic process	1.17e-05	0.00113	4.22	19534	93	647	13	[Apoa1bp - apolipoprotein a-i binding protein, Tkt - transketolase, Fdx1 - ferredoxin 1, Gpd2 - glycerol phosphate dehydrogenase 2, mitochondrial, Pgam2 - phosphoglycerate mutase 2, Pkm - pyruvate kinase, muscle, Aldoa - aldolase a, fructose-bisphosphate, Ldha - lactate dehydrogenase a, Dlat - dihydrolipoamide s-acetyltransferase (e2 component of pyruvate dehydrogenase complex), Gale - galactose-…
GO:0006760	folic acid-containing compound metabolic process	1.21e-05	0.00117	8.45	19534	25	647	7	[Mthfd1l - methylenetetrahydrofolate dehydrogenase (nadp+ dependent) 1-like, Shmt2 - serine hydroxymethyltransferase 2 (mitochondrial), Mthfd1 - methylenetetrahydrofolate dehydrogenase (nadp+ dependent), methenyltetrahydrofolate cyclohydrolase, formyltetrahydrofolate synthase, Dhfr - dihydrofolate reductase, Tyms - thymidylate synthase, Gart - phosphoribosylglycinamide formyltransferase, Atic - 5…
GO:0051225	spindle assembly	1.33e-05	0.00128	4.88	19534	68	647	11	[Haus1 - haus augmin-like complex, subunit 1, Aurka - aurora kinase a, Haus8 - 4haus augmin-like complex, subunit 8, Cdc20 - cell division cycle 20, Tubg1 - tubulin, gamma 1, Mybl2 - myeloblastosis oncogene-like 2, Birc5 - baculoviral iap repeat-containing 5, Haus4 - haus augmin-like complex, subunit 4, Fbxo5 - f-box protein 5, Tubgcp2 - tubulin, gamma complex associated protein 2, Cenpw - centro…
GO:0018130	heterocycle biosynthetic process	1.47e-05	0.0014	1.48	19534	2219	647	109	[Suv39h1 - suppressor of variegation 3-9 homolog 1 (drosophila), 2410016O06Rik - riken cdna 2410016o06 gene, Nudt5 - nudix (nucleoside diphosphate linked moiety x)-type motif 5, Prmt5 - protein arginine n-methyltransferase 5, Pkm - pyruvate kinase, muscle, Umps - uridine monophosphate synthetase, Commd2 - comm domain containing 2, Chchd10 - coiled-coil-helix-coiled-coil-helix domain containing 10…
GO:0019362	pyridine nucleotide metabolic process	1.47e-05	0.0014	4.13	19534	95	647	13	[Apoa1bp - apolipoprotein a-i binding protein, Tkt - transketolase, Fdx1 - ferredoxin 1, Gpd2 - glycerol phosphate dehydrogenase 2, mitochondrial, Pgam2 - phosphoglycerate mutase 2, Pkm - pyruvate kinase, muscle, Aldoa - aldolase a, fructose-bisphosphate, Ldha - lactate dehydrogenase a, Dlat - dihydrolipoamide s-acetyltransferase (e2 component of pyruvate dehydrogenase complex), Gale - galactose-…
GO:0051382	kinetochore assembly	1.54e-05	0.00145	13.72	19534	11	647	5	[Cenpn - centromere protein n, Apitd1 - apoptosis-inducing, taf9-like domain 1, Cenpw - centromere protein w, Stra13 - stimulated by retinoic acid 13, Cenpa - centromere protein a]
GO:1901989	positive regulation of cell cycle phase transition	1.57e-05	0.00146	4.42	19534	82	647	12	[Apex1 - apurinic/apyrimidinic endonuclease 1, Lmnb1 - lamin b1, Rpl17 - ribosomal protein l17, Fam83d - family with sequence similarity 83, member d, Phb2 - prohibitin 2, Ccnd3 - cyclin d3, Birc5 - baculoviral iap repeat-containing 5, Cdk1 - cyclin-dependent kinase 1, Tgfb1 - transforming growth factor, beta 1, Anapc11 - anaphase promoting complex subunit 11, Cdc45 - cell division cycle 45, Cdca…
GO:0072655	establishment of protein localization to mitochondrion	1.57e-05	0.00146	5.3	19534	57	647	10	[Tomm40 - translocase of outer mitochondrial membrane 40 homolog (yeast), Timm13 - translocase of inner mitochondrial membrane 13, Pam16 - presequence translocase-asssociated motor 16 homolog (s. cerevisiae), Timm8a1 - translocase of inner mitochondrial membrane 8a1, Tspo - translocator protein, Fis1 - fission 1 (mitochondrial outer membrane) homolog (yeast), Timm50 - translocase of inner mitocho…
GO:0006733	oxidoreduction coenzyme metabolic process	1.81e-05	0.00167	3.81	19534	111	647	14	[Apoa1bp - apolipoprotein a-i binding protein, Tkt - transketolase, Fdx1 - ferredoxin 1, Gpd2 - glycerol phosphate dehydrogenase 2, mitochondrial, Pgam2 - phosphoglycerate mutase 2, Pkm - pyruvate kinase, muscle, Aldoa - aldolase a, fructose-bisphosphate, Ldha - lactate dehydrogenase a, Coq7 - demethyl-q 7, Dlat - dihydrolipoamide s-acetyltransferase (e2 component of pyruvate dehydrogenase comple…
GO:0072523	purine-containing compound catabolic process	1.85e-05	0.00169	6.71	19534	36	647	8	[Ahcy - s-adenosylhomocysteine hydrolase, Pnp - purine-nucleoside phosphorylase, Nudt3 - nudix (nucleotide diphosphate linked moiety x)-type motif 3, Nudt4 - nudix (nucleoside diphosphate linked moiety x)-type motif 4, Ada - adenosine deaminase, Nudt1 - nudix (nucleoside diphosphate linked moiety x)-type motif 1, Hint1 - histidine triad nucleotide binding protein 1, Acot7 - acyl-coa thioesterase …
GO:1903046	meiotic cell cycle process	2.19e-05	0.002	3.23	19534	159	647	17	[Rad51 - rad51 homolog, Psmc3ip - proteasome (prosome, macropain) 26s subunit, atpase 3, interacting protein, Aurka - aurora kinase a, Pttg1 - pituitary tumor-transforming gene 1, Trip13 - thyroid hormone receptor interactor 13, Ercc1 - excision repair cross-complementing rodent repair deficiency, complementation group 1, Tubg1 - tubulin, gamma 1, Apitd1 - apoptosis-inducing, taf9-like domain 1, …
GO:0072524	pyridine-containing compound metabolic process	2.32e-05	0.0021	3.96	19534	99	647	13	[Apoa1bp - apolipoprotein a-i binding protein, Tkt - transketolase, Fdx1 - ferredoxin 1, Gpd2 - glycerol phosphate dehydrogenase 2, mitochondrial, Pgam2 - phosphoglycerate mutase 2, Pkm - pyruvate kinase, muscle, Aldoa - aldolase a, fructose-bisphosphate, Ldha - lactate dehydrogenase a, Dlat - dihydrolipoamide s-acetyltransferase (e2 component of pyruvate dehydrogenase complex), Gale - galactose-…
GO:1901992	positive regulation of mitotic cell cycle phase transition	2.33e-05	0.0021	4.61	19534	72	647	11	[Apex1 - apurinic/apyrimidinic endonuclease 1, Lmnb1 - lamin b1, Rpl17 - ribosomal protein l17, Phb2 - prohibitin 2, Ccnd3 - cyclin d3, Birc5 - baculoviral iap repeat-containing 5, Cdk1 - cyclin-dependent kinase 1, Tgfb1 - transforming growth factor, beta 1, Cdc45 - cell division cycle 45, Anapc11 - anaphase promoting complex subunit 11, Cdca5 - cell division cycle associated 5]
GO:0022616	DNA strand elongation	2.56e-05	0.0023	12.58	19534	12	647	5	[Pcna - proliferating cell nuclear antigen, Lig1 - ligase i, dna, atp-dependent, Pole - polymerase (dna directed), epsilon, Pold2 - polymerase (dna directed), delta 2, regulatory subunit, Gins1 - gins complex subunit 1 (psf1 homolog)]
GO:0046385	deoxyribose phosphate biosynthetic process	2.56e-05	0.00228	12.58	19534	12	647	5	[Dtymk - deoxythymidylate kinase, Guk1 - guanylate kinase 1, Dut - deoxyuridine triphosphatase, Tyms - thymidylate synthase, Dctd - dcmp deaminase]
GO:0009265	2'-deoxyribonucleotide biosynthetic process	2.56e-05	0.00227	12.58	19534	12	647	5	[Dtymk - deoxythymidylate kinase, Guk1 - guanylate kinase 1, Dut - deoxyuridine triphosphatase, Tyms - thymidylate synthase, Dctd - dcmp deaminase]
GO:0071103	DNA conformation change	2.66e-05	0.00234	4.55	19534	73	647	11	[Ncaph2 - non-smc condensin ii complex, subunit h2, Rad51 - rad51 homolog, Suv39h1 - suppressor of variegation 3-9 homolog 1 (drosophila), Top1mt - dna topoisomerase 1, mitochondrial, Mcm6 - minichromosome maintenance deficient 6 (mis5 homolog, s. pombe) (s. cerevisiae), Mcm7 - minichromosome maintenance deficient 7 (s. cerevisiae), Mcm2 - minichromosome maintenance deficient 2 mitotin (s. cerevi…
GO:1901136	carbohydrate derivative catabolic process	2.88e-05	0.00252	3.89	19534	101	647	13	[Dctpp1 - dctp pyrophosphatase 1, Pnp - purine-nucleoside phosphorylase, Nudt1 - nudix (nucleoside diphosphate linked moiety x)-type motif 1, Dut - deoxyuridine triphosphatase, Pycrl - pyrroline-5-carboxylate reductase-like, Hint1 - histidine triad nucleotide binding protein 1, Hexa - hexosaminidase a, Tgfb1 - transforming growth factor, beta 1, Acot7 - acyl-coa thioesterase 7, Ahcy - s-adenosylh…
GO:1990542	mitochondrial transmembrane transport	2.91e-05	0.00253	4.95	19534	61	647	10	[Atp5o - atp synthase, h+ transporting, mitochondrial f1 complex, o subunit, Tomm40 - translocase of outer mitochondrial membrane 40 homolog (yeast), Timm13 - translocase of inner mitochondrial membrane 13, Pam16 - presequence translocase-asssociated motor 16 homolog (s. cerevisiae), Stoml2 - stomatin (epb7.2)-like 2, Smdt1 - single-pass membrane protein with aspartate rich tail 1, Timm50 - trans…
GO:0019438	aromatic compound biosynthetic process	2.95e-05	0.00256	1.46	19534	2230	647	108	[Suv39h1 - suppressor of variegation 3-9 homolog 1 (drosophila), 2410016O06Rik - riken cdna 2410016o06 gene, Nudt5 - nudix (nucleoside diphosphate linked moiety x)-type motif 5, Prmt5 - protein arginine n-methyltransferase 5, Pkm - pyruvate kinase, muscle, Umps - uridine monophosphate synthetase, Commd2 - comm domain containing 2, Chchd10 - coiled-coil-helix-coiled-coil-helix domain containing 10…
GO:0051783	regulation of nuclear division	3.16e-05	0.00272	2.91	19534	197	647	19	[Pttg1 - pituitary tumor-transforming gene 1, Tacc3 - transforming, acidic coiled-coil containing protein 3, Trip13 - thyroid hormone receptor interactor 13, Phb2 - prohibitin 2, Tubg1 - tubulin, gamma 1, Nup62 - nucleoporin 62, Tgfb1 - transforming growth factor, beta 1, Anapc11 - anaphase promoting complex subunit 11, Cdca5 - cell division cycle associated 5, Ranbp1 - ran binding protein 1, Ccn…
GO:0070585	protein localization to mitochondrion	3.37e-05	0.00288	4.87	19534	62	647	10	[Tomm40 - translocase of outer mitochondrial membrane 40 homolog (yeast), Timm13 - translocase of inner mitochondrial membrane 13, Pam16 - presequence translocase-asssociated motor 16 homolog (s. cerevisiae), Timm8a1 - translocase of inner mitochondrial membrane 8a1, Tspo - translocator protein, Fis1 - fission 1 (mitochondrial outer membrane) homolog (yeast), Timm50 - translocase of inner mitocho…
GO:0009204	deoxyribonucleoside triphosphate catabolic process	3.85e-05	0.00328	17.25	19534	7	647	4	[Dctpp1 - dctp pyrophosphatase 1, Ada - adenosine deaminase, Nudt1 - nudix (nucleoside diphosphate linked moiety x)-type motif 1, Dut - deoxyuridine triphosphatase]
GO:0009132	nucleoside diphosphate metabolic process	3.89e-05	0.00329	4.79	19534	63	647	10	[Ldha - lactate dehydrogenase a, Dtymk - deoxythymidylate kinase, Pgam2 - phosphoglycerate mutase 2, Guk1 - guanylate kinase 1, Gale - galactose-4-epimerase, udp, Galk1 - galactokinase 1, Nudt5 - nudix (nucleoside diphosphate linked moiety x)-type motif 5, Nme3 - nme/nm23 nucleoside diphosphate kinase 3, Pkm - pyruvate kinase, muscle, Aldoa - aldolase a, fructose-bisphosphate]
GO:0009219	pyrimidine deoxyribonucleotide metabolic process	4.05e-05	0.00341	11.61	19534	13	647	5	[Dctpp1 - dctp pyrophosphatase 1, Dtymk - deoxythymidylate kinase, Dut - deoxyuridine triphosphatase, Tyms - thymidylate synthase, Dctd - dcmp deaminase]
GO:0007088	regulation of mitotic nuclear division	4.12e-05	0.00345	3.07	19534	167	647	17	[Pttg1 - pituitary tumor-transforming gene 1, Tacc3 - transforming, acidic coiled-coil containing protein 3, Trip13 - thyroid hormone receptor interactor 13, Tubg1 - tubulin, gamma 1, Phb2 - prohibitin 2, Nup62 - nucleoporin 62, Tgfb1 - transforming growth factor, beta 1, Anapc11 - anaphase promoting complex subunit 11, Cdca5 - cell division cycle associated 5, Ranbp1 - ran binding protein 1, Ccn…
GO:0017038	protein import	4.38e-05	0.00364	3.52	19534	120	647	14	[Nxt1 - ntf2-related export protein 1, Timm13 - translocase of inner mitochondrial membrane 13, Timm50 - translocase of inner mitochondrial membrane 50, Timm22 - translocase of inner mitochondrial membrane 22, Rpain - rpa interacting protein, Nup62 - nucleoporin 62, Dnlz - dnl-type zinc finger, Ran - ran, member ras oncogene family, Tomm40 - translocase of outer mitochondrial membrane 40 homolog …
GO:0009060	aerobic respiration	4.43e-05	0.00367	7.04	19534	30	647	7	[Fxn - frataxin, Sdhb - succinate dehydrogenase complex, subunit b, iron sulfur (ip), Ndufs8 - nadh dehydrogenase (ubiquinone) fe-s protein 8, Ndufs7 - nadh dehydrogenase (ubiquinone) fe-s protein 7, Uqcrc1 - ubiquinol-cytochrome c reductase core protein 1, Uqcr10 - ubiquinol-cytochrome c reductase, complex iii subunit x, Mdh2 - malate dehydrogenase 2, nad (mitochondrial)]
GO:0042773	ATP synthesis coupled electron transport	6.13e-05	0.00504	10.78	19534	14	647	5	[Coq7 - demethyl-q 7, Ndufs2 - nadh dehydrogenase (ubiquinone) fe-s protein 2, Ndufv1 - nadh dehydrogenase (ubiquinone) flavoprotein 1, Ndufa12 - nadh dehydrogenase (ubiquinone) 1 alpha subcomplex, 12, Ndufa7 - nadh dehydrogenase (ubiquinone) 1 alpha subcomplex, 7 (b14.5a)]
GO:0019538	protein metabolic process	6.2e-05	0.00508	1.36	19534	3137	647	141	[Suv39h1 - suppressor of variegation 3-9 homolog 1 (drosophila), 2410016O06Rik - riken cdna 2410016o06 gene, Mrps7 - mitchondrial ribosomal protein s7, Clpp - clpp caseinolytic peptidase, atp-dependent, proteolytic subunit, Prmt5 - protein arginine n-methyltransferase 5, Tufm - tu translation elongation factor, mitochondrial, Chchd1 - coiled-coil-helix-coiled-coil-helix domain containing 1, Eif5a…
GO:0006220	pyrimidine nucleotide metabolic process	6.92e-05	0.00563	6.6	19534	32	647	7	[Dctpp1 - dctp pyrophosphatase 1, Dtymk - deoxythymidylate kinase, Dut - deoxyuridine triphosphatase, Nme3 - nme/nm23 nucleoside diphosphate kinase 3, Tyms - thymidylate synthase, Dctd - dcmp deaminase, Umps - uridine monophosphate synthetase]
GO:0006396	RNA processing	7.45e-05	0.00604	1.89	19534	654	647	41	[Suv39h1 - suppressor of variegation 3-9 homolog 1 (drosophila), Ints1 - integrator complex subunit 1, Snrpf - small nuclear ribonucleoprotein polypeptide f, Naa38 - n(alpha)-acetyltransferase 38, natc auxiliary subunit, Emg1 - emg1 nucleolar protein homolog (s. cerevisiae), Pih1d1 - pih1 domain containing 1, Rps7 - ribosomal protein s7, Tfip11 - tuftelin interacting protein 11, Snrnp40 - small n…
GO:0031536	positive regulation of exit from mitosis	7.51e-05	0.00605	15.1	19534	8	647	4	[Phb2 - prohibitin 2, Birc5 - baculoviral iap repeat-containing 5, Tgfb1 - transforming growth factor, beta 1, Cdca5 - cell division cycle associated 5]
GO:0043457	regulation of cellular respiration	8.04e-05	0.00644	7.88	19534	23	647	6	[Shmt2 - serine hydroxymethyltransferase 2 (mitochondrial), Cdk1 - cyclin-dependent kinase 1, Myc - myelocytomatosis oncogene, Prelid1 - preli domain containing 1, Cisd1 - cdgsh iron sulfur domain 1, Trap1 - tnf receptor-associated protein 1]
GO:0006144	purine nucleobase metabolic process	8.04e-05	0.00641	7.88	19534	23	647	6	[Aprt - adenine phosphoribosyl transferase, Prps1 - phosphoribosyl pyrophosphate synthetase 1, Mthfd1l - methylenetetrahydrofolate dehydrogenase (nadp+ dependent) 1-like, Ada - adenosine deaminase, Mthfd1 - methylenetetrahydrofolate dehydrogenase (nadp+ dependent), methenyltetrahydrofolate cyclohydrolase, formyltetrahydrofolate synthase, Gart - phosphoribosylglycinamide formyltransferase]
GO:0009112	nucleobase metabolic process	8.53e-05	0.00677	6.4	19534	33	647	7	[Aprt - adenine phosphoribosyl transferase, Prps1 - phosphoribosyl pyrophosphate synthetase 1, Mthfd1l - methylenetetrahydrofolate dehydrogenase (nadp+ dependent) 1-like, Ada - adenosine deaminase, Mthfd1 - methylenetetrahydrofolate dehydrogenase (nadp+ dependent), methenyltetrahydrofolate cyclohydrolase, formyltetrahydrofolate synthase, Gart - phosphoribosylglycinamide formyltransferase, Umps - …
GO:0007059	chromosome segregation	9.42e-05	0.00743	3.47	19534	113	647	13	[Cdca8 - cell division cycle associated 8, Dsn1 - dsn1, mind kinetochore complex component, homolog (s. cerevisiae), Pttg1 - pituitary tumor-transforming gene 1, Cenpn - centromere protein n, Tubg1 - tubulin, gamma 1, Cenpw - centromere protein w, Cdca2 - cell division cycle associated 2, Pmf1 - polyamine-modulated factor 1, Ncaph2 - non-smc condensin ii complex, subunit h2, Ran - ran, member ras…
GO:0009116	nucleoside metabolic process	0.0001	0.00785	3.95	19534	84	647	11	[Ahcy - s-adenosylhomocysteine hydrolase, Pnp - purine-nucleoside phosphorylase, Ran - ran, member ras oncogene family, Aprt - adenine phosphoribosyl transferase, Prps1 - phosphoribosyl pyrophosphate synthetase 1, Guk1 - guanylate kinase 1, Pycrl - pyrroline-5-carboxylate reductase-like, Ada - adenosine deaminase, Nme3 - nme/nm23 nucleoside diphosphate kinase 3, Umps - uridine monophosphate synth…
GO:0006221	pyrimidine nucleotide biosynthetic process	0.000104	0.00814	7.55	19534	24	647	6	[Dtymk - deoxythymidylate kinase, Dut - deoxyuridine triphosphatase, Nme3 - nme/nm23 nucleoside diphosphate kinase 3, Tyms - thymidylate synthase, Dctd - dcmp deaminase, Umps - uridine monophosphate synthetase]
GO:0031100	animal organ regeneration	0.000104	0.0081	7.55	19534	24	647	6	[Apoa2 - apolipoprotein a-ii, Aurka - aurora kinase a, Cdk1 - cyclin-dependent kinase 1, Gfer - growth factor, erv1 (s. cerevisiae)-like (augmenter of liver regeneration), Pkm - pyruvate kinase, muscle, Tgfb1 - transforming growth factor, beta 1]
GO:0000226	microtubule cytoskeleton organization	0.000126	0.00975	2.23	19534	352	647	26	[Cetn4 - centrin 4, Calm3 - calmodulin 3, Tuba4a - tubulin, alpha 4a, Tuba1b - tubulin, alpha 1b, Poc1a - poc1 centriolar protein homolog a (chlamydomonas), Cenpw - centromere protein w, Tubb6 - tubulin, beta 6 class v, Ranbp1 - ran binding protein 1, Cdc20 - cell division cycle 20, Tuba1a - tubulin, alpha 1a, Haus4 - haus augmin-like complex, subunit 4, Tubgcp2 - tubulin, gamma complex associate…
GO:0030150	protein import into mitochondrial matrix	0.000127	0.00973	9.43	19534	16	647	5	[Tomm40 - translocase of outer mitochondrial membrane 40 homolog (yeast), Pam16 - presequence translocase-asssociated motor 16 homolog (s. cerevisiae), Timm50 - translocase of inner mitochondrial membrane 50, Grpel1 - grpe-like 1, mitochondrial, Dnlz - dnl-type zinc finger]
GO:0051383	kinetochore organization	0.000127	0.00968	9.43	19534	16	647	5	[Cenpn - centromere protein n, Apitd1 - apoptosis-inducing, taf9-like domain 1, Cenpw - centromere protein w, Stra13 - stimulated by retinoic acid 13, Cenpa - centromere protein a]
GO:0045005	DNA-dependent DNA replication maintenance of fidelity	0.000127	0.00965	6.04	19534	35	647	7	[Timeless - timeless circadian clock 1, Rad51 - rad51 homolog, Pcna - proliferating cell nuclear antigen, Pold1 - polymerase (dna directed), delta 1, catalytic subunit, Pole - polymerase (dna directed), epsilon, Apitd1 - apoptosis-inducing, taf9-like domain 1, Stra13 - stimulated by retinoic acid 13]
GO:0044743	protein transmembrane import into intracellular organelle	0.000127	0.0096	6.04	19534	35	647	7	[Tomm40 - translocase of outer mitochondrial membrane 40 homolog (yeast), Timm13 - translocase of inner mitochondrial membrane 13, Pam16 - presequence translocase-asssociated motor 16 homolog (s. cerevisiae), Timm50 - translocase of inner mitochondrial membrane 50, Timm22 - translocase of inner mitochondrial membrane 22, Grpel1 - grpe-like 1, mitochondrial, Dnlz - dnl-type zinc finger]
GO:0009130	pyrimidine nucleoside monophosphate biosynthetic process	0.000132	0.00991	13.42	19534	9	647	4	[Dut - deoxyuridine triphosphatase, Tyms - thymidylate synthase, Dctd - dcmp deaminase, Umps - uridine monophosphate synthetase]
GO:0002082	regulation of oxidative phosphorylation	0.000133	0.01	7.25	19534	25	647	6	[Gadd45gip1 - growth arrest and dna-damage-inducible, gamma interacting protein 1, Mnf1 - mitochondrial nucleoid factor 1, Shmt2 - serine hydroxymethyltransferase 2 (mitochondrial), Cox7a2 - cytochrome c oxidase subunit viia 2, Cdk1 - cyclin-dependent kinase 1, Myc - myelocytomatosis oncogene]
GO:0006195	purine nucleotide catabolic process	0.000133	0.00995	7.25	19534	25	647	6	[Nudt3 - nudix (nucleotide diphosphate linked moiety x)-type motif 3, Nudt4 - nudix (nucleoside diphosphate linked moiety x)-type motif 4, Ada - adenosine deaminase, Nudt1 - nudix (nucleoside diphosphate linked moiety x)-type motif 1, Hint1 - histidine triad nucleotide binding protein 1, Acot7 - acyl-coa thioesterase 7]
GO:0042455	ribonucleoside biosynthetic process	0.000133	0.0099	7.25	19534	25	647	6	[Pnp - purine-nucleoside phosphorylase, Aprt - adenine phosphoribosyl transferase, Guk1 - guanylate kinase 1, Ada - adenosine deaminase, Nme3 - nme/nm23 nucleoside diphosphate kinase 3, Umps - uridine monophosphate synthetase]
GO:0009163	nucleoside biosynthetic process	0.000133	0.00985	7.25	19534	25	647	6	[Pnp - purine-nucleoside phosphorylase, Aprt - adenine phosphoribosyl transferase, Guk1 - guanylate kinase 1, Ada - adenosine deaminase, Nme3 - nme/nm23 nucleoside diphosphate kinase 3, Umps - uridine monophosphate synthetase]
GO:0019752	carboxylic acid metabolic process	0.000139	0.0103	1.81	19534	718	647	43	[Adtrp - androgen dependent tfpi regulating protein, Fasn - fatty acid synthase, Ccbl2 - cysteine conjugate-beta lyase 2, Scd1 - stearoyl-coenzyme a desaturase 1, Qrsl1 - glutaminyl-trna synthase (glutamine-hydrolyzing)-like 1, Psph - phosphoserine phosphatase, Pycrl - pyrroline-5-carboxylate reductase-like, Mthfd1 - methylenetetrahydrofolate dehydrogenase (nadp+ dependent), methenyltetrahydrofol…
GO:0006564	L-serine biosynthetic process	0.000141	0.0103	22.64	19534	4	647	3	[Psat1 - phosphoserine aminotransferase 1, Psph - phosphoserine phosphatase, Shmt2 - serine hydroxymethyltransferase 2 (mitochondrial)]
GO:0006310	DNA recombination	0.000152	0.011	2.88	19534	168	647	16	[Apex1 - apurinic/apyrimidinic endonuclease 1, Rad51 - rad51 homolog, Psmc3ip - proteasome (prosome, macropain) 26s subunit, atpase 3, interacting protein, Rad54l - rad54 like (s. cerevisiae), Ercc1 - excision repair cross-complementing rodent repair deficiency, complementation group 1, Trip13 - thyroid hormone receptor interactor 13, Rpain - rpa interacting protein, Gins2 - gins complex subunit …
GO:0007006	mitochondrial membrane organization	0.000153	0.0111	3.77	19534	88	647	11	[Tomm40 - translocase of outer mitochondrial membrane 40 homolog (yeast), Timm13 - translocase of inner mitochondrial membrane 13, Slc25a4 - solute carrier family 25 (mitochondrial carrier, adenine nucleotide translocator), member 4, 2410015M20Rik - riken cdna 2410015m20 gene, Timm50 - translocase of inner mitochondrial membrane 50, Mtfp1 - mitochondrial fission process 1, Timm22 - translocase of…
GO:0045333	cellular respiration	0.000162	0.0117	5.03	19534	48	647	8	[Fxn - frataxin, Sdhb - succinate dehydrogenase complex, subunit b, iron sulfur (ip), Ndufs8 - nadh dehydrogenase (ubiquinone) fe-s protein 8, Ndufs7 - nadh dehydrogenase (ubiquinone) fe-s protein 7, Uqcrc1 - ubiquinol-cytochrome c reductase core protein 1, Uqcr10 - ubiquinol-cytochrome c reductase, complex iii subunit x, Mdh2 - malate dehydrogenase 2, nad (mitochondrial), Tbrg4 - transforming gr…
GO:0009185	ribonucleoside diphosphate metabolic process	0.000162	0.0116	5.03	19534	48	647	8	[Ldha - lactate dehydrogenase a, Pgam2 - phosphoglycerate mutase 2, Guk1 - guanylate kinase 1, Gale - galactose-4-epimerase, udp, Galk1 - galactokinase 1, Nudt5 - nudix (nucleoside diphosphate linked moiety x)-type motif 5, Pkm - pyruvate kinase, muscle, Aldoa - aldolase a, fructose-bisphosphate]
GO:0045638	negative regulation of myeloid cell differentiation	0.000169	0.0121	3.73	19534	89	647	11	[Hist1h4d - histone cluster 1, h4d, Hist1h4f - histone cluster 1, h4f, Hist1h4b - histone cluster 1, h4b, Hist4h4 - histone cluster 4, h4, Hist2h4 - histone cluster 2, h4, Hist1h4i - histone cluster 1, h4i, Hist1h4m - histone cluster 1, h4m, Lmo2 - lim domain only 2, Hist1h4n - histone cluster 1, h4n, Myc - myelocytomatosis oncogene, Hist1h4c - histone cluster 1, h4c]
GO:0045787	positive regulation of cell cycle	0.000173	0.0123	2.23	19534	339	647	25	[Lmnb1 - lamin b1, Rpl17 - ribosomal protein l17, Fam83d - family with sequence similarity 83, member d, Phb2 - prohibitin 2, Poc1a - poc1 centriolar protein homolog a (chlamydomonas), Tgfb1 - transforming growth factor, beta 1, Cdca5 - cell division cycle associated 5, Ranbp1 - ran binding protein 1, Ccnb2 - cyclin b2, Ccnd3 - cyclin d3, Racgap1 - rac gtpase-activating protein 1, Il10 - interleu…
GO:0015985	energy coupled proton transport, down electrochemical gradient	0.000174	0.0123	8.88	19534	17	647	5	[Atp5o - atp synthase, h+ transporting, mitochondrial f1 complex, o subunit, Atp5k - atp synthase, h+ transporting, mitochondrial f1f0 complex, subunit e, Stoml2 - stomatin (epb7.2)-like 2, Atp5d - atp synthase, h+ transporting, mitochondrial f1 complex, delta subunit, Atp5e - atp synthase, h+ transporting, mitochondrial f1 complex, epsilon subunit]
GO:0015986	ATP synthesis coupled proton transport	0.000174	0.0123	8.88	19534	17	647	5	[Atp5o - atp synthase, h+ transporting, mitochondrial f1 complex, o subunit, Atp5k - atp synthase, h+ transporting, mitochondrial f1f0 complex, subunit e, Stoml2 - stomatin (epb7.2)-like 2, Atp5d - atp synthase, h+ transporting, mitochondrial f1 complex, delta subunit, Atp5e - atp synthase, h+ transporting, mitochondrial f1 complex, epsilon subunit]
GO:0072527	pyrimidine-containing compound metabolic process	0.000188	0.0132	4.93	19534	49	647	8	[Dctpp1 - dctp pyrophosphatase 1, Dtymk - deoxythymidylate kinase, Pycrl - pyrroline-5-carboxylate reductase-like, Dut - deoxyuridine triphosphatase, Nme3 - nme/nm23 nucleoside diphosphate kinase 3, Tyms - thymidylate synthase, Dctd - dcmp deaminase, Umps - uridine monophosphate synthetase]
GO:0010564	regulation of cell cycle process	0.000207	0.0144	1.91	19534	553	647	35	[Lmnb1 - lamin b1, Cetn4 - centrin 4, Rpl17 - ribosomal protein l17, Fam83d - family with sequence similarity 83, member d, Phb2 - prohibitin 2, Poc1a - poc1 centriolar protein homolog a (chlamydomonas), Tgfb1 - transforming growth factor, beta 1, Cdca5 - cell division cycle associated 5, Ranbp1 - ran binding protein 1, Ccnb2 - cyclin b2, Fzr1 - fizzy/cell division cycle 20 related 1 (drosophila)…
GO:0072528	pyrimidine-containing compound biosynthetic process	0.000211	0.0146	6.71	19534	27	647	6	[Dtymk - deoxythymidylate kinase, Dut - deoxyuridine triphosphatase, Nme3 - nme/nm23 nucleoside diphosphate kinase 3, Tyms - thymidylate synthase, Dctd - dcmp deaminase, Umps - uridine monophosphate synthetase]
GO:0006119	oxidative phosphorylation	0.000214	0.0148	12.08	19534	10	647	4	[Atp5o - atp synthase, h+ transporting, mitochondrial f1 complex, o subunit, Chchd10 - coiled-coil-helix-coiled-coil-helix domain containing 10, Fxn - frataxin, Stoml2 - stomatin (epb7.2)-like 2]
GO:0042775	mitochondrial ATP synthesis coupled electron transport	0.000214	0.0147	12.08	19534	10	647	4	[Coq7 - demethyl-q 7, Ndufs2 - nadh dehydrogenase (ubiquinone) fe-s protein 2, Ndufv1 - nadh dehydrogenase (ubiquinone) flavoprotein 1, Ndufa12 - nadh dehydrogenase (ubiquinone) 1 alpha subcomplex, 12]
GO:0046386	deoxyribose phosphate catabolic process	0.000214	0.0146	12.08	19534	10	647	4	[Dctpp1 - dctp pyrophosphatase 1, Ada - adenosine deaminase, Nudt1 - nudix (nucleoside diphosphate linked moiety x)-type motif 1, Dut - deoxyuridine triphosphatase]
GO:0009221	pyrimidine deoxyribonucleotide biosynthetic process	0.000214	0.0146	12.08	19534	10	647	4	[Dtymk - deoxythymidylate kinase, Dut - deoxyuridine triphosphatase, Tyms - thymidylate synthase, Dctd - dcmp deaminase]
GO:0009129	pyrimidine nucleoside monophosphate metabolic process	0.000214	0.0145	12.08	19534	10	647	4	[Dut - deoxyuridine triphosphatase, Tyms - thymidylate synthase, Dctd - dcmp deaminase, Umps - uridine monophosphate synthetase]
GO:0006082	organic acid metabolic process	0.00022	0.0149	1.73	19534	802	647	46	[Fasn - fatty acid synthase, Adtrp - androgen dependent tfpi regulating protein, Ccbl2 - cysteine conjugate-beta lyase 2, Scd1 - stearoyl-coenzyme a desaturase 1, Qrsl1 - glutaminyl-trna synthase (glutamine-hydrolyzing)-like 1, Psph - phosphoserine phosphatase, Mthfd1 - methylenetetrahydrofolate dehydrogenase (nadp+ dependent), methenyltetrahydrofolate cyclohydrolase, formyltetrahydrofolate synth…
GO:0022613	ribonucleoprotein complex biogenesis	0.000221	0.0149	3.39	19534	107	647	12	[C1qbp - complement component 1, q subcomponent binding protein, 2410016O06Rik - riken cdna 2410016o06 gene, Nip7 - nuclear import 7 homolog (s. cerevisiae), Rpl14 - ribosomal protein l14, Rpl7 - ribosomal protein l7, Emg1 - emg1 nucleolar protein homolog (s. cerevisiae), Eif6 - eukaryotic translation initiation factor 6, Rps7 - ribosomal protein s7, Nhp2 - nhp2 ribonucleoprotein, Noc4l - nucleol…
GO:1901657	glycosyl compound metabolic process	0.000221	0.0148	3.39	19534	107	647	12	[Ahcy - s-adenosylhomocysteine hydrolase, Pnp - purine-nucleoside phosphorylase, Ran - ran, member ras oncogene family, Aprt - adenine phosphoribosyl transferase, Prps1 - phosphoribosyl pyrophosphate synthetase 1, Guk1 - guanylate kinase 1, Pycrl - pyrroline-5-carboxylate reductase-like, Ada - adenosine deaminase, Nme3 - nme/nm23 nucleoside diphosphate kinase 3, Akr7a5 - aldo-keto reductase famil…
GO:0043436	oxoacid metabolic process	0.000233	0.0155	1.75	19534	758	647	44	[Adtrp - androgen dependent tfpi regulating protein, Fasn - fatty acid synthase, Ccbl2 - cysteine conjugate-beta lyase 2, Scd1 - stearoyl-coenzyme a desaturase 1, Qrsl1 - glutaminyl-trna synthase (glutamine-hydrolyzing)-like 1, Psph - phosphoserine phosphatase, Pycrl - pyrroline-5-carboxylate reductase-like, Mthfd1 - methylenetetrahydrofolate dehydrogenase (nadp+ dependent), methenyltetrahydrofol…
GO:0006364	rRNA processing	0.000233	0.0155	2.88	19534	157	647	15	[Suv39h1 - suppressor of variegation 3-9 homolog 1 (drosophila), Pop5 - processing of precursor 5, ribonuclease p/mrp family (s. cerevisiae), Rpl7 - ribosomal protein l7, Emg1 - emg1 nucleolar protein homolog (s. cerevisiae), Rps7 - ribosomal protein s7, Pih1d1 - pih1 domain containing 1, Eif6 - eukaryotic translation initiation factor 6, Nhp2l1 - nhp2 non-histone chromosome protein 2-like 1 (s. …
GO:0042451	purine nucleoside biosynthetic process	0.000235	0.0155	8.39	19534	18	647	5	[Pnp - purine-nucleoside phosphorylase, Aprt - adenine phosphoribosyl transferase, Guk1 - guanylate kinase 1, Ada - adenosine deaminase, Nme3 - nme/nm23 nucleoside diphosphate kinase 3]
GO:0046129	purine ribonucleoside biosynthetic process	0.000235	0.0155	8.39	19534	18	647	5	[Pnp - purine-nucleoside phosphorylase, Aprt - adenine phosphoribosyl transferase, Guk1 - guanylate kinase 1, Ada - adenosine deaminase, Nme3 - nme/nm23 nucleoside diphosphate kinase 3]
GO:0072594	establishment of protein localization to organelle	0.000235	0.0154	2.5	19534	229	647	19	[Nxt1 - ntf2-related export protein 1, Pmm1 - phosphomannomutase 1, Timm13 - translocase of inner mitochondrial membrane 13, Timm8a1 - translocase of inner mitochondrial membrane 8a1, Tspo - translocator protein, Fis1 - fission 1 (mitochondrial outer membrane) homolog (yeast), Timm50 - translocase of inner mitochondrial membrane 50, Pih1d1 - pih1 domain containing 1, Timm22 - translocase of inner…
GO:1901659	glycosyl compound biosynthetic process	0.000261	0.017	6.47	19534	28	647	6	[Pnp - purine-nucleoside phosphorylase, Aprt - adenine phosphoribosyl transferase, Guk1 - guanylate kinase 1, Ada - adenosine deaminase, Nme3 - nme/nm23 nucleoside diphosphate kinase 3, Umps - uridine monophosphate synthetase]
GO:0051983	regulation of chromosome segregation	0.000276	0.0179	3.53	19534	94	647	11	[Cdc6 - cell division cycle 6, Pttg1 - pituitary tumor-transforming gene 1, Tacc3 - transforming, acidic coiled-coil containing protein 3, Trip13 - thyroid hormone receptor interactor 13, Fen1 - flap structure specific endonuclease 1, Birc5 - baculoviral iap repeat-containing 5, Chtf18 - ctf18, chromosome transmission fidelity factor 18, Anapc11 - anaphase promoting complex subunit 11, Naa10 - n(…
GO:0006783	heme biosynthetic process	0.00031	0.0201	7.95	19534	19	647	5	[Fxn - frataxin, Urod - uroporphyrinogen decarboxylase, Alas1 - aminolevulinic acid synthase 1, Alad - aminolevulinate, delta-, dehydratase, Tmem14c - transmembrane protein 14c]
GO:0071353	cellular response to interleukin-4	0.00031	0.02	7.95	19534	19	647	5	[Fasn - fatty acid synthase, Tuba1b - tubulin, alpha 1b, Mcm2 - minichromosome maintenance deficient 2 mitotin (s. cerevisiae), Keap1 - kelch-like ech-associated protein 1, Alad - aminolevulinate, delta-, dehydratase]
GO:0006298	mismatch repair	0.00031	0.0199	7.95	19534	19	647	5	[Pcna - proliferating cell nuclear antigen, Rpa2 - replication protein a2, Ercc1 - excision repair cross-complementing rodent repair deficiency, complementation group 1, Rnaseh2a - ribonuclease h2, large subunit, Exo1 - exonuclease 1]
GO:0051220	cytoplasmic sequestering of protein	0.00031	0.0198	7.95	19534	19	647	5	[Tacc3 - transforming, acidic coiled-coil containing protein 3, Get4 - golgi to er traffic protein 4 homolog (s. cerevisiae), Keap1 - kelch-like ech-associated protein 1, Nfkbib - nuclear factor of kappa light polypeptide gene enhancer in b cells inhibitor, beta, Myeov2 - myeloma overexpressed 2]
GO:0034654	nucleobase-containing compound biosynthetic process	0.000314	0.02	1.4	19534	2158	647	100	[Suv39h1 - suppressor of variegation 3-9 homolog 1 (drosophila), 2410016O06Rik - riken cdna 2410016o06 gene, Nudt5 - nudix (nucleoside diphosphate linked moiety x)-type motif 5, Prmt5 - protein arginine n-methyltransferase 5, Pkm - pyruvate kinase, muscle, Umps - uridine monophosphate synthetase, Commd2 - comm domain containing 2, Chchd10 - coiled-coil-helix-coiled-coil-helix domain containing 10…
GO:0009264	deoxyribonucleotide catabolic process	0.000327	0.0207	10.98	19534	11	647	4	[Dctpp1 - dctp pyrophosphatase 1, Ada - adenosine deaminase, Nudt1 - nudix (nucleoside diphosphate linked moiety x)-type motif 1, Dut - deoxyuridine triphosphatase]
GO:0034433	steroid esterification	0.000344	0.0217	18.11	19534	5	647	3	[Scd1 - stearoyl-coenzyme a desaturase 1, Stard4 - star-related lipid transfer (start) domain containing 4, Soat1 - sterol o-acyltransferase 1]
GO:0034434	sterol esterification	0.000344	0.0216	18.11	19534	5	647	3	[Scd1 - stearoyl-coenzyme a desaturase 1, Stard4 - star-related lipid transfer (start) domain containing 4, Soat1 - sterol o-acyltransferase 1]
GO:0034435	cholesterol esterification	0.000344	0.0215	18.11	19534	5	647	3	[Scd1 - stearoyl-coenzyme a desaturase 1, Stard4 - star-related lipid transfer (start) domain containing 4, Soat1 - sterol o-acyltransferase 1]
GO:0006287	base-excision repair, gap-filling	0.000344	0.0214	18.11	19534	5	647	3	[Pcna - proliferating cell nuclear antigen, Pold1 - polymerase (dna directed), delta 1, catalytic subunit, Pole - polymerase (dna directed), epsilon]
GO:0009211	pyrimidine deoxyribonucleoside triphosphate metabolic process	0.000344	0.0214	18.11	19534	5	647	3	[Dctpp1 - dctp pyrophosphatase 1, Dtymk - deoxythymidylate kinase, Dut - deoxyuridine triphosphatase]
GO:0008610	lipid biosynthetic process	0.000372	0.023	2.05	19534	398	647	27	[Fasn - fatty acid synthase, Scd1 - stearoyl-coenzyme a desaturase 1, Isyna1 - myo-inositol 1-phosphate synthase a1, Tamm41 - tam41, mitochondrial translocator assembly and maintenance protein, homolog (s. cerevisiae), Agpat5 - 1-acylglycerol-3-phosphate o-acyltransferase 5 (lysophosphatidic acid acyltransferase, epsilon), Pigx - phosphatidylinositol glycan anchor biosynthesis, class x, Pigyl - p…
GO:0009119	ribonucleoside metabolic process	0.000391	0.0241	4	19534	68	647	9	[Ahcy - s-adenosylhomocysteine hydrolase, Pnp - purine-nucleoside phosphorylase, Ran - ran, member ras oncogene family, Aprt - adenine phosphoribosyl transferase, Guk1 - guanylate kinase 1, Pycrl - pyrroline-5-carboxylate reductase-like, Ada - adenosine deaminase, Nme3 - nme/nm23 nucleoside diphosphate kinase 3, Umps - uridine monophosphate synthetase]
GO:0098813	nuclear chromosome segregation	0.000416	0.0255	5.03	19534	42	647	7	[Ncaph2 - non-smc condensin ii complex, subunit h2, Cdca8 - cell division cycle associated 8, Dsn1 - dsn1, mind kinetochore complex component, homolog (s. cerevisiae), Ran - ran, member ras oncogene family, Espl1 - extra spindle poles-like 1 (s. cerevisiae), Pttg1 - pituitary tumor-transforming gene 1, Tubg1 - tubulin, gamma 1]
GO:0006338	chromatin remodeling	0.000433	0.0264	3.15	19534	115	647	12	[2410016O06Rik - riken cdna 2410016o06 gene, Hist1h2ba - histone cluster 1, h2ba, Top1mt - dna topoisomerase 1, mitochondrial, Elof1 - elongation factor 1 homolog (elf1, s. cerevisiae), Pole3 - polymerase (dna directed), epsilon 3 (p17 subunit), Pih1d1 - pih1 domain containing 1, Nudt5 - nudix (nucleoside diphosphate linked moiety x)-type motif 5, Myc - myelocytomatosis oncogene, Npm3 - nucleopla…
GO:0005996	monosaccharide metabolic process	0.000446	0.0271	2.97	19534	132	647	13	[Pmm1 - phosphomannomutase 1, Gpd2 - glycerol phosphate dehydrogenase 2, mitochondrial, Pgam2 - phosphoglycerate mutase 2, Fabp5 - fatty acid binding protein 5, epidermal, Nudt5 - nudix (nucleoside diphosphate linked moiety x)-type motif 5, Myc - myelocytomatosis oncogene, Pkm - pyruvate kinase, muscle, Aldoa - aldolase a, fructose-bisphosphate, Ldha - lactate dehydrogenase a, Dlat - dihydrolipoa…
GO:1901575	organic substance catabolic process	0.000448	0.0271	1.54	19534	1213	647	62	[Dut - deoxyuridine triphosphatase, Nudt5 - nudix (nucleoside diphosphate linked moiety x)-type motif 5, Hint1 - histidine triad nucleotide binding protein 1, Endog - endonuclease g, Pkm - pyruvate kinase, muscle, Psmf1 - proteasome (prosome, macropain) inhibitor subunit 1, Ahcy - s-adenosylhomocysteine hydrolase, Skp2 - s-phase kinase-associated protein 2 (p45), Ptbp1 - polypyrimidine tract bind…
GO:0070925	organelle assembly	0.000451	0.0272	1.94	19534	467	647	30	[Cetn4 - centrin 4, Mpv17l2 - mpv17 mitochondrial membrane protein-like 2, Cenpn - centromere protein n, Trappc6a - trafficking protein particle complex 6a, Rps23 - ribosomal protein s23, Poc1a - poc1 centriolar protein homolog a (chlamydomonas), Cenpw - centromere protein w, Lsm4 - lsm4 homolog, u6 small nuclear rna associated (s. cerevisiae), Cdc20 - cell division cycle 20, Haus4 - haus augmin-…
GO:0050686	negative regulation of mRNA processing	0.000468	0.0281	5.84	19534	31	647	6	[Rbmxl1 - rna binding motif protein, x linked-like-1, Ptbp1 - polypyrimidine tract binding protein 1, C1qbp - complement component 1, q subcomponent binding protein, Rnps1 - ribonucleic acid binding protein s1, Nelfe - negative elongation factor complex member e, rdbp, Rbm42 - rna binding motif protein 42]
GO:0043467	regulation of generation of precursor metabolites and energy	0.000473	0.0283	3.32	19534	100	647	11	[Gadd45gip1 - growth arrest and dna-damage-inducible, gamma interacting protein 1, Mnf1 - mitochondrial nucleoid factor 1, Ppp1r3e - protein phosphatase 1, regulatory (inhibitor) subunit 3e, Shmt2 - serine hydroxymethyltransferase 2 (mitochondrial), Cox7a2 - cytochrome c oxidase subunit viia 2, Cdk1 - cyclin-dependent kinase 1, Eif6 - eukaryotic translation initiation factor 6, Myc - myelocytomat…
GO:0051054	positive regulation of DNA metabolic process	0.000474	0.0283	2.44	19534	223	647	18	[Dscc1 - defective in sister chromatid cohesion 1 homolog (s. cerevisiae), Pnp - purine-nucleoside phosphorylase, Rad51 - rad51 homolog, Pcna - proliferating cell nuclear antigen, Chtf8 - ctf8, chromosome transmission fidelity factor 8, Aurkb - aurora kinase b, Stoml2 - stomatin (epb7.2)-like 2, Ercc1 - excision repair cross-complementing rodent repair deficiency, complementation group 1, Cdk1 - …
GO:0006122	mitochondrial electron transport, ubiquinol to cytochrome c	0.000477	0.0284	10.06	19534	12	647	4	[Uqcrfs1 - ubiquinol-cytochrome c reductase, rieske iron-sulfur polypeptide 1, Uqcrc1 - ubiquinol-cytochrome c reductase core protein 1, Uqcr10 - ubiquinol-cytochrome c reductase, complex iii subunit x, AI462493 - expressed sequence ai462493]
GO:0042255	ribosome assembly	0.000477	0.0282	10.06	19534	12	647	4	[C1qbp - complement component 1, q subcomponent binding protein, Mpv17l2 - mpv17 mitochondrial membrane protein-like 2, Nip7 - nuclear import 7 homolog (s. cerevisiae), Eif6 - eukaryotic translation initiation factor 6]
GO:0033554	cellular response to stress	0.000488	0.0287	1.54	19534	1217	647	62	[Crip1 - cysteine-rich protein 1 (intestinal), Suv39h1 - suppressor of variegation 3-9 homolog 1 (drosophila), Stoml2 - stomatin (epb7.2)-like 2, Atf6b - activating transcription factor 6 beta, Exo1 - exonuclease 1, Timeless - timeless circadian clock 1, Fxn - frataxin, H2afx - h2a histone family, member x, Lig1 - ligase i, dna, atp-dependent, Fzr1 - fizzy/cell division cycle 20 related 1 (drosop…
GO:0045931	positive regulation of mitotic cell cycle	0.000506	0.0297	2.8	19534	151	647	14	[Apex1 - apurinic/apyrimidinic endonuclease 1, Lmnb1 - lamin b1, Rpl17 - ribosomal protein l17, Phb2 - prohibitin 2, Cdk1 - cyclin-dependent kinase 1, Nup62 - nucleoporin 62, Tgfb1 - transforming growth factor, beta 1, Cdca5 - cell division cycle associated 5, Cdc45 - cell division cycle 45, Anapc11 - anaphase promoting complex subunit 11, Ranbp1 - ran binding protein 1, Ccnd3 - cyclin d3, Birc5 …
GO:1903578	regulation of ATP metabolic process	0.000541	0.0316	3.83	19534	71	647	9	[Ndufc2 - nadh dehydrogenase (ubiquinone) 1, subcomplex unknown, 2, Gadd45gip1 - growth arrest and dna-damage-inducible, gamma interacting protein 1, Mnf1 - mitochondrial nucleoid factor 1, Shmt2 - serine hydroxymethyltransferase 2 (mitochondrial), Cox7a2 - cytochrome c oxidase subunit viia 2, Tspo - translocator protein, Cdk1 - cyclin-dependent kinase 1, Eif6 - eukaryotic translation initiation …
GO:0009179	purine ribonucleoside diphosphate metabolic process	0.000558	0.0325	4.8	19534	44	647	7	[Ldha - lactate dehydrogenase a, Pgam2 - phosphoglycerate mutase 2, Guk1 - guanylate kinase 1, Gale - galactose-4-epimerase, udp, Galk1 - galactokinase 1, Pkm - pyruvate kinase, muscle, Aldoa - aldolase a, fructose-bisphosphate]
GO:0009135	purine nucleoside diphosphate metabolic process	0.000558	0.0324	4.8	19534	44	647	7	[Ldha - lactate dehydrogenase a, Pgam2 - phosphoglycerate mutase 2, Guk1 - guanylate kinase 1, Gale - galactose-4-epimerase, udp, Galk1 - galactokinase 1, Pkm - pyruvate kinase, muscle, Aldoa - aldolase a, fructose-bisphosphate]
GO:0006275	regulation of DNA replication	0.000561	0.0324	3.26	19534	102	647	11	[Timeless - timeless circadian clock 1, Dscc1 - defective in sister chromatid cohesion 1 homolog (s. cerevisiae), Pcna - proliferating cell nuclear antigen, Hras1 - harvey rat sarcoma virus oncogene 1, Chtf8 - ctf8, chromosome transmission fidelity factor 8, Stoml2 - stomatin (epb7.2)-like 2, Gmnn - geminin, Rfc3 - replication factor c (activator 1) 3, Chtf18 - ctf18, chromosome transmission fide…
GO:0044085	cellular component biogenesis	0.000591	0.034	3.04	19534	119	647	12	[C1qbp - complement component 1, q subcomponent binding protein, 2410016O06Rik - riken cdna 2410016o06 gene, Nip7 - nuclear import 7 homolog (s. cerevisiae), Rpl14 - ribosomal protein l14, Rpl7 - ribosomal protein l7, Emg1 - emg1 nucleolar protein homolog (s. cerevisiae), Eif6 - eukaryotic translation initiation factor 6, Rps7 - ribosomal protein s7, Nhp2 - nhp2 ribonucleoprotein, Noc4l - nucleol…
GO:0008654	phospholipid biosynthetic process	0.000594	0.0341	2.89	19534	136	647	13	[Isyna1 - myo-inositol 1-phosphate synthase a1, Tamm41 - tam41, mitochondrial translocator assembly and maintenance protein, homolog (s. cerevisiae), Dpm3 - dolichyl-phosphate mannosyltransferase polypeptide 3, Fabp5 - fatty acid binding protein 5, epidermal, Agpat5 - 1-acylglycerol-3-phosphate o-acyltransferase 5 (lysophosphatidic acid acyltransferase, epsilon), Mboat7 - membrane bound o-acyltra…
GO:0045840	positive regulation of mitotic nuclear division	0.000617	0.0352	4.16	19534	58	647	8	[Ranbp1 - ran binding protein 1, Phb2 - prohibitin 2, Birc5 - baculoviral iap repeat-containing 5, Pebp1 - phosphatidylethanolamine binding protein 1, Nup62 - nucleoporin 62, Tgfb1 - transforming growth factor, beta 1, Anapc11 - anaphase promoting complex subunit 11, Cdca5 - cell division cycle associated 5]
GO:0006730	one-carbon metabolic process	0.000647	0.0368	6.86	19534	22	647	5	[Mthfd1l - methylenetetrahydrofolate dehydrogenase (nadp+ dependent) 1-like, Shmt2 - serine hydroxymethyltransferase 2 (mitochondrial), Mthfd1 - methylenetetrahydrofolate dehydrogenase (nadp+ dependent), methenyltetrahydrofolate cyclohydrolase, formyltetrahydrofolate synthase, Dhfr - dihydrofolate reductase, Tyms - thymidylate synthase]
GO:0070670	response to interleukin-4	0.000647	0.0367	6.86	19534	22	647	5	[Fasn - fatty acid synthase, Tuba1b - tubulin, alpha 1b, Mcm2 - minichromosome maintenance deficient 2 mitotin (s. cerevisiae), Keap1 - kelch-like ech-associated protein 1, Alad - aminolevulinate, delta-, dehydratase]
GO:0033045	regulation of sister chromatid segregation	0.000665	0.0376	3.72	19534	73	647	9	[Cdc6 - cell division cycle 6, Pttg1 - pituitary tumor-transforming gene 1, Tacc3 - transforming, acidic coiled-coil containing protein 3, Trip13 - thyroid hormone receptor interactor 13, Fen1 - flap structure specific endonuclease 1, Birc5 - baculoviral iap repeat-containing 5, Anapc11 - anaphase promoting complex subunit 11, Naa10 - n(alpha)-acetyltransferase 10, nata catalytic subunit, Cdca5 -…
GO:0051785	positive regulation of nuclear division	0.000665	0.0374	3.72	19534	73	647	9	[Ranbp1 - ran binding protein 1, Phb2 - prohibitin 2, Birc5 - baculoviral iap repeat-containing 5, Pebp1 - phosphatidylethanolamine binding protein 1, Fbxo5 - f-box protein 5, Nup62 - nucleoporin 62, Tgfb1 - transforming growth factor, beta 1, Anapc11 - anaphase promoting complex subunit 11, Cdca5 - cell division cycle associated 5]
GO:0046078	dUMP metabolic process	0.000671	0.0377	15.1	19534	6	647	3	[Dut - deoxyuridine triphosphatase, Tyms - thymidylate synthase, Dctd - dcmp deaminase]
GO:0009177	pyrimidine deoxyribonucleoside monophosphate biosynthetic process	0.000671	0.0375	15.1	19534	6	647	3	[Dut - deoxyuridine triphosphatase, Tyms - thymidylate synthase, Dctd - dcmp deaminase]
GO:0009157	deoxyribonucleoside monophosphate biosynthetic process	0.000671	0.0374	15.1	19534	6	647	3	[Dut - deoxyuridine triphosphatase, Tyms - thymidylate synthase, Dctd - dcmp deaminase]
GO:0042454	ribonucleoside catabolic process	0.000671	0.0373	9.29	19534	13	647	4	[Ahcy - s-adenosylhomocysteine hydrolase, Pnp - purine-nucleoside phosphorylase, Ada - adenosine deaminase, Pycrl - pyrroline-5-carboxylate reductase-like]
GO:0009215	purine deoxyribonucleoside triphosphate metabolic process	0.000671	0.0371	9.29	19534	13	647	4	[Pnp - purine-nucleoside phosphorylase, Guk1 - guanylate kinase 1, Ada - adenosine deaminase, Nudt1 - nudix (nucleoside diphosphate linked moiety x)-type motif 1]
GO:0009143	nucleoside triphosphate catabolic process	0.000671	0.037	9.29	19534	13	647	4	[Dctpp1 - dctp pyrophosphatase 1, Ada - adenosine deaminase, Nudt1 - nudix (nucleoside diphosphate linked moiety x)-type motif 1, Dut - deoxyuridine triphosphatase]
GO:0090329	regulation of DNA-dependent DNA replication	0.000736	0.0404	4.59	19534	46	647	7	[Dscc1 - defective in sister chromatid cohesion 1 homolog (s. cerevisiae), Timeless - timeless circadian clock 1, Chtf8 - ctf8, chromosome transmission fidelity factor 8, Stoml2 - stomatin (epb7.2)-like 2, Rfc3 - replication factor c (activator 1) 3, Rfc4 - replication factor c (activator 1) 4, Chtf18 - ctf18, chromosome transmission fidelity factor 18]
GO:0033365	protein localization to organelle	0.000751	0.0411	1.9	19534	460	647	29	[Nxt1 - ntf2-related export protein 1, Ctdnep1 - ctd nuclear envelope phosphatase 1, Pmm1 - phosphomannomutase 1, Fam83d - family with sequence similarity 83, member d, Pih1d1 - pih1 domain containing 1, Ran - ran, member ras oncogene family, Champ1 - chromosome alignment maintaining phosphoprotein 1, Nup93 - nucleoporin 93, Nup133 - nucleoporin 133, Cenpa - centromere protein a, Ehd1 - eh-domain…
GO:0048025	negative regulation of mRNA splicing, via spliceosome	0.000804	0.0438	6.56	19534	23	647	5	[Rbmxl1 - rna binding motif protein, x linked-like-1, Ptbp1 - polypyrimidine tract binding protein 1, C1qbp - complement component 1, q subcomponent binding protein, Rnps1 - ribonucleic acid binding protein s1, Rbm42 - rna binding motif protein 42]
GO:0017004	cytochrome complex assembly	0.000804	0.0437	6.56	19534	23	647	5	[Cox19 - cytochrome c oxidase assembly protein 19, Mnf1 - mitochondrial nucleoid factor 1, Cox14 - cytochrome c oxidase assembly protein 14, Uqcr10 - ubiquinol-cytochrome c reductase, complex iii subunit x, AI462493 - expressed sequence ai462493]
GO:1902850	microtubule cytoskeleton organization involved in mitosis	0.000853	0.0461	3.32	19534	91	647	10	[Aurkb - aurora kinase b, Aurka - aurora kinase a, Tacc3 - transforming, acidic coiled-coil containing protein 3, Cdc20 - cell division cycle 20, Tubg1 - tubulin, gamma 1, Mybl2 - myeloblastosis oncogene-like 2, Birc5 - baculoviral iap repeat-containing 5, Poc1a - poc1 centriolar protein homolog a (chlamydomonas), Tubgcp2 - tubulin, gamma complex associated protein 2, Cenpa - centromere protein a]
GO:0006066	alcohol metabolic process	0.000876	0.0472	2.31	19534	235	647	18	[Fdx1 - ferredoxin 1, Isyna1 - myo-inositol 1-phosphate synthase a1, Rdh10 - retinol dehydrogenase 10 (all-trans), Scap - srebf chaperone, Sgpp2 - sphingosine-1-phosphate phosphotase 2, Akr7a5 - aldo-keto reductase family 7, member a5 (aflatoxin aldehyde reductase), Pgp - phosphoglycolate phosphatase, Nudt3 - nudix (nucleotide diphosphate linked moiety x)-type motif 3, Nudt4 - nudix (nucleoside d…
GO:0016072	rRNA metabolic process	0.000882	0.0474	2.54	19534	178	647	15	[Suv39h1 - suppressor of variegation 3-9 homolog 1 (drosophila), Pop5 - processing of precursor 5, ribonuclease p/mrp family (s. cerevisiae), Rpl7 - ribosomal protein l7, Emg1 - emg1 nucleolar protein homolog (s. cerevisiae), Rps7 - ribosomal protein s7, Pih1d1 - pih1 domain containing 1, Eif6 - eukaryotic translation initiation factor 6, Nhp2l1 - nhp2 non-histone chromosome protein 2-like 1 (s. …
GO:0000212	meiotic spindle organization	0.000915	0.049	8.63	19534	14	647	4	[Espl1 - extra spindle poles-like 1 (s. cerevisiae), Aurka - aurora kinase a, Tubg1 - tubulin, gamma 1, Fbxo5 - f-box protein 5]
GO:1904666	regulation of ubiquitin protein ligase activity	0.000915	0.0488	8.63	19534	14	647	4	[Fzr1 - fizzy/cell division cycle 20 related 1 (drosophila), Cdc20 - cell division cycle 20, Rps7 - ribosomal protein s7, Fbxo5 - f-box protein 5]
GO:0007064	mitotic sister chromatid cohesion	0.000915	0.0487	8.63	19534	14	647	4	[Dscc1 - defective in sister chromatid cohesion 1 homolog (s. cerevisiae), Pttg1 - pituitary tumor-transforming gene 1, Cdc20 - cell division cycle 20, Cdca5 - cell division cycle associated 5]
GO:0009151	purine deoxyribonucleotide metabolic process	0.000915	0.0485	8.63	19534	14	647	4	[Pnp - purine-nucleoside phosphorylase, Guk1 - guanylate kinase 1, Ada - adenosine deaminase, Nudt1 - nudix (nucleoside diphosphate linked moiety x)-type motif 1]
GO:0006261	DNA-dependent DNA replication	0.000922	0.0487	5.18	19534	35	647	6	[Pold1 - polymerase (dna directed), delta 1, catalytic subunit, Rfc3 - replication factor c (activator 1) 3, Pold2 - polymerase (dna directed), delta 2, regulatory subunit, Rfc4 - replication factor c (activator 1) 4, Orc6 - origin recognition complex, subunit 6, Rpain - rpa interacting protein]
GO:0065002	intracellular protein transmembrane transport	0.000957	0.0503	4.4	19534	48	647	7	[Tomm40 - translocase of outer mitochondrial membrane 40 homolog (yeast), Timm13 - translocase of inner mitochondrial membrane 13, Pam16 - presequence translocase-asssociated motor 16 homolog (s. cerevisiae), Timm50 - translocase of inner mitochondrial membrane 50, Timm22 - translocase of inner mitochondrial membrane 22, Grpel1 - grpe-like 1, mitochondrial, Dnlz - dnl-type zinc finger]
GO:0046939	nucleotide phosphorylation	0.000957	0.0502	4.4	19534	48	647	7	[Pgam2 - phosphoglycerate mutase 2, Guk1 - guanylate kinase 1, Gale - galactose-4-epimerase, udp, Galk1 - galactokinase 1, Nme3 - nme/nm23 nucleoside diphosphate kinase 3, Pkm - pyruvate kinase, muscle, Aldoa - aldolase a, fructose-bisphosphate]
