# Supplementary material for: MicroRNA-155 is essential for the optimal proliferation and survival of plasmablast B cells
Source: Life Sci Alliance. 2019 May 16;2(3):e201800244. doi: 10.26508/lsa.201800244 (PMC6524163; doi:10.26508/lsa.201800244)
Supplement: Supplementary file 3 [file LSA-2018-00244_TableS3.xlsx]

## Sheet: Sheet1
Gene	Forward	Reverse
HPRT	TGGACAGGACTGAAAGACTTG	CCAGCAGGTCAGCAAAGAACTTA
MYC	CCTAGTGCTGCATGAGGAGACA	TCTTCTCCACAGACACCACATCA
Taqman assay name	Assay ID	Comment
MYB	Mm00501741_m1	Transcript abundance
B2M	Mm00437762_m1	Normalisation
